# Supplementary material for: Multiple opsin expression in cubozoan ocelli indicates functional redundancy
Source: Research Square preprint supplement (doi:10.21203/rs.3.rs-8376914/v1), 2026-01-02
Supplement: Supplementary file 1 [file 68b7f78e014b3926d34c9a5d.xlsx]

## Sheet: supplementary material
Group	Reference	Origin	Database	Developmental stage / sex	Tissue	Locality	Abbreviation	Genus	species	Accession no.	Bioproject	UniProt ID	Isolate	Description	Sequence	Gap / ambiguity (%)	Chi-2 composition	Chi-square p-value (%)
Supplementary Material 2. Details of all candidate cubozoan opsin sequences included in phylogenetic analyses (outgroup sequences also listed; see methods). Listed with each sequence are their respective opsin groups (Groups 1A, 1B, or 2), genus and species names, GenBank accession no., further identification details (Bioproject ID, UniProtID and/or isolate, if provided), opsin name (T. cystophor…
2	Ames et al. (2016)	Transcriptome (Illumina HiSeq)	TSA	Adult male and female	Gastric cirri, ovaries, tentacle (and adjoining pedalium base), rhopalium, and planulae	Bonaire, Dutch Caribbean		Alatina	alata	GEUJ01016822					VTASLIF---NLIVLVTFACV-KRRLTF--REVLFVSIALSDLMQALLGYAIEIVTTADGY-WSFGTLL---------------CRLVG--FVVTFLGLVSINHLALLALDRYLTICHPRKTEKMH-KSNVNALFFALLGWFYALVWAIFPIIGWSGYAL-ENTKTRCSVDWKSKSIAG-KAYVVCLFLFNFVSHIIILSFCYYKIHKT---------------------------------------LVRL----------------------------SGPATS--------------------------------------------------------D--------------------------------------------DGTSPI------…	0.4664	passed	0.8932
2	Ames et al. (2016)	Transcriptome (Illumina HiSeq)	TSA	Adult male and female	Gastric cirri, ovaries, tentacle (and adjoining pedalium base), rhopalium, and planulae	Bonaire, Dutch Caribbean		Alatina	alata	GEUJ01021526					VFFSITL---NLVVIITFYRL-RHKLQF--KDAVMASMALSDMVQAIIGYPLEVFTVVDGK-WTFGMEV---------------CQVAA--FFITALGQVSICHLTALALDRYFTVCKPFVAAAIH-GSMRNAGMVIFSCWFYAFFWAVLPLVGWSNYDV-EGDGMRCSINWADDSPKS-YSYRVCLFVFIYLIPVSIMLITYVLVQGE---------------------------------------MKNM----------------------------RGRAAQLF---------------------------------------------------------------------------------------------------GSESEA------…	0.4594	passed	0.7595
2	Ohdera et al. (2019)	WGS (Illumina)	WGS	Medusae	Complete animals	Caribbean		Alatina	alata	PUGI020005099	PRJNA421156		isolate RG 5287		AFGAIMA---NGLALMAFFKY-IQEKSL--RDVLRISMAFADLLQASIGYFPELVIVSVGV--SNESILF--------------CRIAS--CLVTLFGLSSLTHLSFLSVEMYVNICKPYVGDQIF-TRKRCKVFIECVCWIYPIFWTTIAFTGWARYTT-ETDS-RCSISWTDTSIGN-VTYIIALFLFCFVIPLAIILFSLISVRRE---------------------------------------VDRL----------------------------HKRTVERS------------------------------------------------------------------------------------------------------------DGQ…	0.4965	passed	0.5974
2	Ohdera et al. (2019)	WGS (Illumina)	WGS	Medusae	Complete animals	Caribbean		Alatina	alata	PUGI020015541	PRJNA421156		isolate RG 5287		VFFSITL---NLVVIITFYRL-RHKLQF--KDAVMASMALSDMVQAIIGYPLEVFTVVDGK-WTFGMEV---------------CQVAA--FFITALGQVSICHLTALALDRYFTVCKPFVAAAIH-GSMRNAGMVIFSCWFYAFFWAVLPLVGWSNYDV-EGDGMRCSINWADDSPKS-YSYRVCLFVFIYLIPVSIMLITYVLVQGE---------------------------------------MKNM----------------------------RGRAAQLF---------------------------------------------------------------------------------------------------GSESEA------…	0.4594	passed	0.7595
2	Ohdera et al. (2019)	WGS (Illumina)	WGS	Medusae	Complete animals	Caribbean		Alatina	alata	PUGI020019096	PRJNA421156		isolate RG 5287		VIIGIAM---NILVIVKMIYY-RSSMKF--RDYFVLSLAFSDLLQATVGYPIELAN------NKFGGAVMNEDI----------CAAAG--FCITWFGLLSITHLVCLAFDHYMVICRPFDAHHLH-QKHAQPIRILLICWCYALFWASLPFTGVSGYKV-EDEL-YCSIDWSAKSVKN-TVYIVLLFTFCYAIPVIFMLSTLTLTSME---------------------------------------LMKM----------------------------RQRNSRRS---------------------------------------------------------------------------------------------------SCTSAS------…	0.4541	passed	0.7816
2	Ohdera et al. (2019)	WGS (Illumina)	WGS	Medusae	Complete animals	Caribbean		Alatina	alata	PUGI020023237	PRJNA421156		isolate RG 5287		ILQSTTL---NSLVIVTMITF-HKSLKF--RDIIHCSIALSDLLQGLLGYPLEVVSMIRGR-WSFSNTA---------------CEGTA--FLVTWLGLVSITHLALMSIDRCLTIRTPLKAKLLH-ERRYLVLYFIVPGWIYGIVWALPPLIGWDGYVI-ENET-RCSINWTTTDYGG-TIYIAFLFLFCFVLPIIVMLCSFVLIKVE---------------------------------------LRKM----------------------------RHHSCHNF---------------------------------------------------------------------------------------------------GPTSES------…	0.4611	passed	0.7663
2	Ohdera et al. (2019)	WGS (Illumina)	WGS	Medusae	Complete animals	Caribbean		Alatina	alata	PUGI020250395	PRJNA421156		isolate RG 5287		VTASLIF---NLIVLVTFACV-KRRLTF--REVLFVSIALSDLMQALLGYAIEIVTTADGY-WSFGTLL---------------CRLVG--FVVTFLGLVSINHLALLALDRYLTICHPRKTEKMH-KSNVNALFFALVRWFYALVWAIFPIIGWSGYAL-ENTKTRCSVDWKSKSIAG-KAYVVCLFLFNFVSHIIILSF------------------------------------------------------------------------------------------------------------------------------------------------------------------------------------------------------…	0.6926	passed	0.7223
2	Ohdera et al. (2019)	WGS (Illumina)	WGS	Medusae	Complete animals	Caribbean		Alatina	alata	PUGI020503979	PRJNA421156		isolate RG 5287		----------------------------------------------------------------------------------------------------------------------------------------------------------------------------------------VCLFLFNFVSHIIILSFCYYKIHKT---------------------------------------LVRL---	0.7438	passed	0.6981
2	Helm, R., Ames, C. L., Pirro, S. and Collins, A. (unpublished). The complete genome sequence of Carybdea marsupialis auct. non. Direct Submission to NCBI.	WGS (Illumina)	WGS	Medusae	Complete animals	USA		Carybdea	cf. marsupialis	JAAAKL020001343	PRJNA493611		isolate IRGN 8SOK1XWZS6		VFFSITL---NLVVIITFYRL-RQKLAF--KDAVMASMALSDMVQAIIGYPLEVFTVVDGK-WTFGMEI---------------CQVAA--FFITALGQVSIAHLTALALDRYFTVCKPFVASAIH-GSMRNAGMVIFFCWFYAFFWAVLPLVGWSNYDV-EGDGMRCSINWADDSPRS-YSYRICLFVFIYFIPVLIMMATYVFVQGE---------------------------------------MKNM----------------------------RGRAAQLF---------------------------------------------------------------------------------------------------GSESEA------…	0.4594	passed	0.2049
2	Helm, R., Ames, C. L., Pirro, S. and Collins, A. (unpublished). The complete genome sequence of Carybdea marsupialis auct. non. Direct Submission to NCBI.	WGS (Illumina)	WGS	Medusae	Complete animals	USA		Carybdea	cf. marsupialis	JAAAKL020007023	PRJNA493611		isolate IRGN 8SOK1XWZS6		VTASLIF---NLIVLVTFACV-KRRLTF--REVLFVSVALSDLMQALFGYTIEIVTTADGY-WSFGTLV---------------CRLVG--FIVTFLGLVSINHLALLAIDRYLTICHPRKMEKIH-KSNVNALFFALVGWFYALLWAVFPILGWSGYAL-ENAKIRCSVDWRSKSISG-KAYVICLFLFNFISHIIILTFCYYKIHKT---------------------------------------LLRL----------------------------SGPIPGPV------------------------------------------------------E--------------------------------------------EGASPT------…	0.4629	passed	0.8822
2	Helm, R., Ames, C. L., Pirro, S. and Collins, A. (unpublished). The complete genome sequence of Carybdea marsupialis auct. non. Direct Submission to NCBI.	WGS (Illumina)	WGS	Medusae	Complete animals	USA		Carybdea	cf. marsupialis	JAAAKL020015496	PRJNA493611		isolate IRGN 8SOK1XWZS6		AFGAITL---NGVALVAFFRY-IQKKSL--RDILRISMAFGDLLQACLGYFPELIIVSVGV--SSESIMF--------------CKVAS--YLVTFFGLSTLSHLSVLSGEMYLNICRPYLADQLL-GRKCYKISLLFGCWIYPLFWATIAFTGWASYGI-ETDS-RCSINWTDKSIGS-VTYIISLFIFCFVLPLVIILFSLISVQKE---------------------------------------VSQL----------------------------HKRMAEKS------------------------------------------------------------------------------------------------------------DVQ…	0.4735	passed	0.458
2	Helm, R., Ames, C. L., Pirro, S. and Collins, A. (unpublished). The complete genome sequence of Carybdea marsupialis auct. non. Direct Submission to NCBI.	WGS (Illumina)	WGS	Medusae	Complete animals	USA		Carybdea	cf. marsupialis	JAAAKL020031671	PRJNA493611		isolate IRGN 8SOK1XWZS6		ILQSSTL---NSLVIVTMMKV-HKTLKF--RDMIHCSIAWSDLFQGLLGYPLEVVSMVRGK-WSLGSDA---------------CHFTA--FFVTWLGLVSISHLAVMSIDRCITIRSPLKAKLLH-DRRVNALYFIIPSWLYGLFWAFPPLVGWNEYVV-ENNS-RCSIDWRATNYKG-IIYLVSLFLFCFIMPIIIMLCSFVLIKVE---------------------------------------LRKV----------------------------RHHSSSAF---------------------------------------------------------------------------------------------------GPTSES------…	0.4664	passed	0.8367
2	Helm, R., Ames, C. L., Pirro, S. and Collins, A. (unpublished). The complete genome sequence of Carybdea marsupialis auct. non. Direct Submission to NCBI.	WGS (Illumina)	WGS	Medusae	Complete animals	USA		Carybdea	cf. marsupialis	JAAAKL020031671	PRJNA493611		isolate IRGN 8SOK1XWZS6		VTISVAL---NGVILAKFIFL-YKNLKF--RDFIIFSLAISDFSQALLGYPLELSNNGLKS----------------VLSNVRICYIAG--FIVAWCGITSITHLVVLSFDRYLSICHPFRAYNLH-HGRRRAIPFSVASWFYAFIWTALPFTGLSRYKI-EGQL-FCSLDWSSKNTSN-VTYVSLLFVFCFLAPVVFMVFTYICTTRE---------------------------------------LAKM----------------------------RQLTVVRT---------------------------------------------------------------------------------------------------AKSSVW------…	0.4594	passed	0.858
2	Helm, R., Ames, C. L., Pirro, S. and Collins, A. (unpublished). The complete genome sequence of Carybdea marsupialis auct. non. Direct Submission to NCBI.	WGS (Illumina)	WGS	Medusae	Complete animals	USA		Carybdea	cf. marsupialis	JAAAKL020047125	PRJNA493611		isolate IRGN 8SOK1XWZS6		VVIGITM---NILVIAKMIYF-RAKMQF--RDYLVLSLAVSDLLQATVGYPIEMAN------NRFGDAVMYEGI----------CAAAG--FCITWFGLISISHLVVLGFDRYVVICRPFDAHILH-EKHKRPVRFILGCWCYALFWSSLPFTGLSAYKI-EDDL-FCSINWSSRSIKN-KVYILLLFTFCYAIPVILMLLMLTLTSIE---------------------------------------LFKM----------------------------RQRNSRRS---------------------------------------------------------------------------------------------------SMTSVS------…	0.4717	passed	0.9587
2	Koyanagi et al. (2008)	Sanger sequencing	Protein	Medusae	Rhopalia	Oki Islands, Japan		Carybdea	rastonii	BAG80696				opsin	VFLSISL---NMIVLITFYRL-RHKLAF--KDALMASMAFSDVVQAIVGYPLEVFTVVDGK-WTFGMEL---------------CQVAG--FFITALGQVSIAHLTALALDRYFTVCRPFVATAIH-GSMRNAGMVIFVCWFYASFWAVLPLVGWSNYDV-EGDGMRCSINWADDSPKS-YSYRVCLFVFIYLIPVLLMVATYVLVQGE---------------------------------------MKNM----------------------------RGRAAQLF---------------------------------------------------------------------------------------------------GSESEA------…	0.4841	passed	0.5129
2	Khalturin et al. (2019)	Transcriptome (Illumina MiSeq)	TSA	Medusae	Assorted (refer to supplementary material of paper)	Ishikawa fishing port, Ishikawa, Okinawa, Japan		Chironex	yamaguchii	GHAX01011388	PRJNA498169				----------------------------------------------------------------------------------------------------------------------PFKAQVLI-QPTSKSSYFVLGCWLYGLFWAVMPLIGLATYVM-EGNN-RCSLKWASSGTKG-MVYILLLFLFCFLLPIVLMSLFFSLISRE---------------------------------------LRKM---	0.6254	passed	0.9857
2	Khalturin et al. (2019)	Transcriptome (Illumina MiSeq)	TSA	Medusae	Assorted (refer to supplementary material of paper)	Ishikawa fishing port, Ishikawa, Okinawa, Japan		Chironex	yamaguchii	GHAX01050330	PRJNA498178				----------------------------------------------------------------------------------------------------------------------------IH-GSLRNAGMVIFVCWFYACFWAVLPLVGWSNYDL-ESDGMRCSINWQDASPKS-YSYRVCLFVFLYLIPVLIMGLTYMLVQRE---------------------------------------MQNM---	0.636	passed	0.8762
2	Khalturin et al. (2019)	Transcriptome (Illumina MiSeq)	TSA	Medusae	Assorted (refer to supplementary material of paper)	Ishikawa fishing port, Ishikawa, Okinawa, Japan		Chironex	yamaguchii	GHAX01059582	PRJNA498182				VSASIIF---NLLVLITFRYI-KRPLTF--REILFVSIAISDLLQALFGYSIEIITTGLGY-WSFGILM---------------CQMIG--FMVTFLGLVSINHLALLAIDRYLTVCHPRKMEKIH-KSKTNAVFFALLGWIYALIWAIFPIVGWSNYAL-ERGKTRCSVNWKSESVSS-KAYVVCLFIFNFVSHIIILIFCYYKIHKS---------------------------------------LRRL----------------------------ANLEMQTH------------------------------------------------------R--------------------------------------------EASG--------…	0.4664	passed	0.6734
2	Khalturin et al. (2019)	Transcriptome (Illumina MiSeq)	TSA	Medusae	Assorted (refer to supplementary material of paper)	Ishikawa fishing port, Ishikawa, Okinawa, Japan		Chironex	yamaguchii	GHAX01070243	PRJNA498188				VSCSLTL---NTIQLIIFGKR-ACRLRY--RNQILFSLAVSDVLQACFGYLPEAINVIEGN-AESNNTLL--------------CKVAT--FLATMFGIVSITHLAGLALEVYFNICKPYVADLYF-NSRFFQAVTLIVFWIYGMFWAAIVFSGWSRYET-FSDF-RCSLSWDDTSEKN-VSYIICLFFFCLACPTAVMMFSFISVWKE---------------------------------------LKKM----------------------------YKSQCQNK---------------------------------------------------------------------------------------------------GKNHAA---DL-…	0.4859	passed	0.8566
2	Khalturin et al. (2019)	Transcriptome (Illumina MiSeq)	TSA	Medusae	Assorted (refer to supplementary material of paper)	Ishikawa fishing port, Ishikawa, Okinawa, Japan		Chironex	yamaguchii	GHAX01073574	PRJNA498191				VFLSITL---NLAVIVTFFRL-RHKLTF--KDALMASMALSDLVQAIIGYPMEVFTVIEGE-WTFGAQA---------------CQIAA--FFITALGQVSIAHLTALALDRYFTVCRPFVATAIH-GSLRNAGMVIFVCWFYACFWAVLPLVGWSNYDL-ESDGMRCSINWQDASPKS-YSYRVCLFVFLYLIPVLIMGLTYMLVQRE---------------------------------------MQNM----------------------------RGRAAQLF---------------------------------------------------------------------------------------------------GSESEA------…	0.4594	passed	0.476
2	Ames, C. L. and Pirro, S. (unpublished). The complete genome sequence of Chironex yamaguchii, the Viper Jellyfish. Direct Submission to NCBI.	WGS (Illumina)	WGS	Medusae	Tentacle	Naha Port, Okinawa, Japan		Chironex	yamaguchii	JANTCA010000092	PRJNA764276		isolate IRGN CYG001		VSASIIF---NLLVLITFRYI-KRPLTF--REILFVSIAISDLLQALFGYSIEIITTGLGY-WSFGILM---------------CQMIG--FMVTFLGLVSINHLALLAIDRYLTVCHPRKMEKIH-KSKTNAVFFALLGWIYALIWAIFPIVGWSNYAL-ERGKTRCSVNWKSESVSS-KAYVVCLFIFNFVSHIIILIFCYYKIHKS---------------------------------------LRRL----------------------------ANLEMQTH------------------------------------------------------R--------------------------------------------EASG--------…	0.4664	passed	0.6734
2	Ames, C. L. and Pirro, S. (unpublished). The complete genome sequence of Chironex yamaguchii, the Viper Jellyfish. Direct Submission to NCBI.	WGS (Illumina)	WGS	Medusae	Tentacle	Naha Port, Okinawa, Japan		Chironex	yamaguchii	JANTCA010000935	PRJNA764276		isolate IRGN CYG001		IVLSVSL---NGLLIITFIFF-RKRMKF--RDAILLSMSVSDFMQALLGYPLEVASVTEGG-WQFSMTA---------------CRATA--FFVTWLGLVSISHLVVLSFDRYIAICYPFKAQVLI-QPTSKSSYFVLGCWLYGLFWAVMPLIGLATYVM-EGNN-RCSLKWASSGTKG-MVYILLLFLFCFLLPIVLMSLFFSLISRE---------------------------------------LRKM----------------------------RRRIGDLT---------------------------------------------------------------------------------------------------GGNSRQ------…	0.4594	passed	0.9834
2	Ames, C. L. and Pirro, S. (unpublished). The complete genome sequence of Chironex yamaguchii, the Viper Jellyfish. Direct Submission to NCBI.	WGS (Illumina)	WGS	Medusae	Tentacle	Naha Port, Okinawa, Japan		Chironex	yamaguchii	JANTCA010006686	PRJNA764276		isolate IRGN CYG001		VACSLVA---NGAQIGTFLYKKSHRKMF--RNLLLLSLAINDILQACLGYAPVVIITAIGR------------TKEIDL----FCTVGC--FLATLLGLVSITHLSLLAVEIYMNVCKPYTADKCF-KNSAFKVTVLLICWVYGTFWASIVFTGWSHYET--LSSTGCSLSWRDNNVRN-VSYFICLLFFCLLCPVIIMVVSFISVQRE---------------------------------------LQRM----------------------------YQAECRAK---------------------------------------------------------------------------------------------------GKKY--------…	0.4965	passed	0.8092
2	Ames, C. L. and Pirro, S. (unpublished). The complete genome sequence of Chironex yamaguchii, the Viper Jellyfish. Direct Submission to NCBI.	WGS (Illumina)	WGS	Medusae	Tentacle	Naha Port, Okinawa, Japan		Chironex	yamaguchii	JANTCA010012790	PRJNA764276		isolate IRGN CYG001		ILLSVIA---NEIVVVSLITW-QKPLNF--RDSLLVSLGISDFLQALIGYPLEVSSLRQQA-WSFSADV---------------CRASA--FIITFLGLVSISHLVILSLERYVTICKPFRAAYLE-HSRKITMCALILPWSYALVWSALPLVGWSNYAF-EQDGLRCSVNWNGQSENE-KSYVFSLLAFCFVIPLFIMATTFVGVHKE---------------------------------------LKKM----------------------------KMTACALF---------------------------------------------------------------------------------------------------GQRSFA------…	0.4452	passed	0.757
2	Ames, C. L. and Pirro, S. (unpublished). The complete genome sequence of Chironex yamaguchii, the Viper Jellyfish. Direct Submission to NCBI.	WGS (Illumina)	WGS	Medusae	Tentacle	Naha Port, Okinawa, Japan		Chironex	yamaguchii	JANTCA010016074	PRJNA764276		isolate IRGN CYG001		VFLSITL---NLAVIVTFFRL-RHKLTF--KDALMASMALSDLVQAIIGYPMEVFTVIEGE-WTFGAQA---------------CQIAA--FFITALGQVSIAHLTALALDRYFTVCRPFVATAIH-GSLRNAGMVIFVCWFYACFWAVLPLVGWSNYDL-ESDGMRCSINWQDASPKS-YSYRVCLFVFLYLIPVLIMGLTYMLVQRE---------------------------------------MQNM----------------------------RGRAAQLF---------------------------------------------------------------------------------------------------GSESEA------…	0.4594	passed	0.476
2	Ames, C. L. and Pirro, S. (unpublished). The complete genome sequence of Chironex yamaguchii, the Viper Jellyfish. Direct Submission to NCBI.	WGS (Illumina)	WGS	Medusae	Tentacle	Naha Port, Okinawa, Japan		Chironex	yamaguchii	JANTCA010016419	PRJNA764276		isolate IRGN CYG001		VSCSLTL---NTIQLIIFGKR-ACRLRY--RNQILFSLAVSDVLQACFGYLPEAINVIEGN-AESNNTLL--------------CKVAT--FLATMFGIVSITHLAGLALEVYFNICKPYVADLYF-NSRFFQAVTLIVFWIYGMFWAAIVFSGWSRYET-FSDF-RCSLSWDDTSEKN-VSYIICLFFFCLACPTAVMIFSFISVWKE---------------------------------------LKKM----------------------------YKSQCQNK---------------------------------------------------------------------------------------------------GKNHAA---DL-…	0.4876	passed	0.8488
2	Ames, C. L. and Pirro, S. (unpublished). The complete genome sequence of Chironex yamaguchii, the Viper Jellyfish. Direct Submission to NCBI.	WGS (Illumina)	WGS	Medusae	Tentacle	Naha Port, Okinawa, Japan		Chironex	yamaguchii	JANTCA010065421	PRJNA764276		isolate IRGN CYG001		VAASVIL---NGCVIAKFIYF-RKKMKY--RDLILLSLATSDLFQALCGYPLEIVN------YILGSQAVISNA----------CVAAG--FLVTWFGLTSISHLVVLSYDRYLAICKPFKAHSLY-IDNKKSLHFIGASWLYALFWAVVPFAGVTKYKL-ELEL-FCSLDWSSRSTSS-KIYLSFLFIFCFIVPVIMMLFMFVFTKKE---------------------------------------LSKM----------------------------RQLTAKRN---------------------------------------------------------------------------------------------------TANSSL------…	0.4806	passed	0.3919
2	Khalturin et al. (2019)	Transcriptome (Illumina MiSeq)	TSA	Medusae	Complete animals	Maeda fishing port, Onna, Okinawa, Japan		Copula	sivickisi	GHBG01122609	PRJNA498772				VFLSISL---NLIVLITFYRL-RHKLSF--KDALMASMAFSDVVQAIIGYPLEVFTVVDGR-WTFGMEL---------------CQVAA--FFITALGQVSIAHLTALALDRYFTVCRPFVATAIH-GSMKNAGMLIFFCWFYAFFWAVLPLVGWSNYDV-EGDGMRCSINWADDSPKS-YSYRVCLFVFLYLIPVLIMALTYILVQGE---------------------------------------MKNM----------------------------RGRASQLF---------------------------------------------------------------------------------------------------GSESEA------…	0.4594	passed	0.834
2	Khalturin et al. (2019)	Transcriptome (Illumina MiSeq)	TSA	Medusae	Complete animals	Maeda fishing port, Onna, Okinawa, Japan		Copula	sivickisi	GHBG01122610	PRJNA498773				----ISL---NLIVLITFYRL-RNKLAF--KDALMASMAFSDVVQAIIGYPLEVFTVVDGR-WTFGMEL---------------CQVAA--FFITALGQVSIAHLTALALDRYFTVCKPFVATAIH-GSMKNAGLVIFFCWFYAFFWAVLPLVGWSNYDV-EGDGMRCSINWADDSPKS-YSYRVCLFVFLYLIPVLIMALTYILVQGE---------------------------------------MKNM---	0.4664	passed	0.8307
2	Khalturin et al. (2019)	Transcriptome (Illumina MiSeq)	TSA	Medusae	Complete animals	Maeda fishing port, Onna, Okinawa, Japan		Copula	sivickisi	GHBG01122611	PRJNA498774				----ISL---NLIVLITFYRL-RNKLAF--KDALMASMAFSDVVQAIIGYPLEVFTVVDGR-WTFGMEL---------------CQVAA--FFITALGQVSIAHLTALALDRYFTVCKPFVATAIH-GSMKNAGLVIFFCWFYAFFWAVLPLVGWSNYDV-EGDGMRCSINWADDSPKS-YSYRVCLFVFLYLIPVLIMALTYILVQGE---------------------------------------MKNM---	0.4664	passed	0.8307
2	Khalturin et al. (2019)	Transcriptome (Illumina MiSeq)	TSA	Medusae	Complete animals	Maeda fishing port, Onna, Okinawa, Japan		Copula	sivickisi	GHBG01122613	PRJNA498775				----ISL---NLIVLITFYRL-RNKLAF--KDALMASMAFSDVVQAIIGYPLEVFTVVDGR-WTFGMEL---------------CQVAA--FFITALGQVSIAHLTALALDRYFTVCKPFVATAIH-GSMKNAGLVIFFCWFYAFFWAVLPLVGWSNYDV-EGDGMRCSINWADDSPKS-YSYRVCLFVFIYLIPVLIMTLTYILVQGE---------------------------------------MKNM---	0.5477	passed	0.8583
2	Khalturin et al. (2019)	Transcriptome (Illumina MiSeq)	TSA	Medusae	Complete animals	Maeda fishing port, Onna, Okinawa, Japan		Copula	sivickisi	GHBG01182776	PRJNA498776				---------------------------------------------------------------------------------------------------------------------------------------------------------------------------------------IISLFVFCFVVPIFVMLVSFAAIRLE---------------------------------------LRKM---	0.735	passed	0.6613
2	Khalturin et al. (2019)	Transcriptome (Illumina MiSeq)	TSA	Medusae	Complete animals	Maeda fishing port, Onna, Okinawa, Japan		Copula	sivickisi	GHBG01226799	PRJNA498778				-------------------------------------------------------------------------------------------------------------------------------------------------------------------------VNWRDKSFSG-KAYVICLFLFGFLTHIVTLVFCYYRIHKT---------------------------------------LVKL---	0.7155	passed	0.4931
2	Khalturin et al. (2019)	Transcriptome (Illumina MiSeq)	TSA	Adult male	Gonads	Ondo Fishing Port, Hiroshima Prefecture, Japan		Morbakka	virulenta	GHAF01023584	PRJNA494059				----------------------------------------------------------------------------------------------------SIAHLTALALDRYFTVCKPFVASSIH-GSMRNAGLVIFFCWFYAVFWAVLPLVGWSDYNV-EGDGMRCSINWADDSPKS-YSYRVCLFVFLYLIPVFIMGMTYIFVQGE---------------------------------------MKNM---	0.5954	passed	0.9799
2	Khalturin et al. (2019)	WGS (Illumina MiSeq)	WGS	Adult male	Gonads	Ondo Fishing Port, Hiroshima Prefecture, Japan		Morbakka	virulenta	RDPX01000025	PRJNA494059		isolate OFP		VTASVTF---NLIVLITFGNV-KRRLTF--REVFFVSIALSDLLQGLFGYGVEIVTTADGY-WSFGALA---------------CQMVG--FIVTFLGLVSVNHLALLAVDRYLTICHPKKTEKIH-KSRTNALFFALLGWVYAFVWAILPVLGWSGYSI-EITKIRCSVNWQNRSISG-KTYVVCLLLFGFVVHIIILAFCYYKIHKT---------------------------------------FVRLGN--------------------------SAKSPPCQ---------------------------------------------------------------------------------------------------IEKSLT------…	0.4611	passed	0.8007
2	Khalturin et al. (2019)	WGS (Illumina MiSeq)	WGS	Adult male	Gonads	Ondo Fishing Port, Hiroshima Prefecture, Japan		Morbakka	virulenta	RDPX01000036	PRJNA494059		isolate OFP		VCLSITL---NTVVLITFYRL-RHKLAF--KDALMASMAFSDVVQAIIGYPLEVFTVVEGK-WTFGMEL---------------CQVAA--FFITALGQVSIAHLTALALDRYFTVCKPFVASSIH-GSMRNAGLVIFFCWFYAVFWAVLPLVGWSDYNV-EGDGMRCSINWADDSPKS-YSYRVCLFVFLYLIPVFIMGMTYIFVQGE---------------------------------------MKNM----------------------------RGRASQLF---------------------------------------------------------------------------------------------------GSESEA------…	0.4611	passed	0.8695
2	Khalturin et al. (2019)	WGS (Illumina MiSeq)	WGS	Adult male	Gonads	Ondo Fishing Port, Hiroshima Prefecture, Japan		Morbakka	virulenta	RDPX01000071	PRJNA494059		isolate OFP		VCCSTFS---NILVLMVFKNI-GTVKTV--RDLLRISMAVSDILQAVLGYLPEIIIVLLGN--TDGTLAF--------------CKISS--CFTTLLGLVSITHLAVLSVEMYYNICKPYFSYKYF-QMLRIKVLIVVGAWVYAIFWATIVFSGWSEYAV-ETKS-RCSIKWTDTSPAN-TTYVVCLFTFCFLLPLAIMIFCLRRVQMD---------------------------------------VNII----------------------------FLTECKER---------------------------------------------------------------------------------------------------GAKYSL---EA-…	0.4841	passed	0.2273
2	Khalturin et al. (2019)	WGS (Illumina MiSeq)	WGS	Adult male	Gonads	Ondo Fishing Port, Hiroshima Prefecture, Japan		Morbakka	virulenta	RDPX01000529	PRJNA494059		isolate OFP		VIMAITL---NSLLIAKIIYY-RKKITV--RDCILLSLAISDFLQATLGYGVELAN------NSFGIGGMNPVM----------CSTSG--FLITWFGLASISHLTLLAYDRYMIICQPFAAQLLH-ENFCRFALYILGCWCFSLFWSILPLVGFTSYQM-DKDM-YCTLKWSTDDIYD-EVYIILLFTFCYFMPIVFLGILFFRAKAE---------------------------------------LSKM----------------------------RQRNIRRT---------------------------------------------------------------------------------------------------SVNSAC------…	0.4629	passed	0.5856
2	Collins, A. and Pirro, S. (unpublished). The complete genome sequence of Tamoya ohboya. Direct Submission to NCBI.	WGS (Illumina)	WGS	Medusae	Bell	Dutch Caribbean		Tamoya	ohboya	JAOTRP010215448	PRJNA676141		isolate 5EI4VPYLNR		VFLSISL---NMIVLITFYRL-RHKLTF--KDALMASMALSDVVQAIIGYPLEVFTVVDGK-WTFGVEL---------------CQIAA--FFITALGQVSIAHLTALALDRYFTVCRPFVATAIH-GSMRNAGMVIFFCWFYATFWAVLPLVGWSNYDV-EGDGMRCSINWADDSPKS-YSYRVCLFVFLYLIPILIMGATYIFVQGE---------------------------------------MKNM----------------------------RGRASQLF---------------------------------------------------------------------------------------------------GAESDA------…	0.6201	passed	0.8449
2	Collins, A. and Pirro, S. (unpublished). The complete genome sequence of Tamoya ohboya. Direct Submission to NCBI.	WGS (Illumina)	WGS	Medusae	Bell	Dutch Caribbean		Tamoya	ohboya	JAOTRP010216351	PRJNA676141		isolate 5EI4VPYLNR		IFVSTLL---NGLVVLTMFKA-RDKLKF--RDLIHVSVSISDLIQGILGYPLEVLSVLEGK-WQFGSTA---------------CEGTA--FVVTWLGLVSISHLVAMSIDRCITICKPFKAQIIH-QNRIDALYFVIPSWIYGFFWAATPLFGWGGYAT-EGLA-RCSIDWRVTDAVG-SSYIISLFLFCFVLPIFVMLYSLAAIRME---------------------------------------LRRM----------------------------RGRSKSTF---------------------------------------------------------------------------------------------------GEDSES------…	0.6078	passed	0.6415
2	Liegertová et al. (2015)	Transcriptome (454 pyrosequencing)	Protein	Assorted (refer to paper)	Assorted (refer to paper)	La Parguerra, Puerto Rico	Tcop13-LEO	Tripedalia	cystophora	AGB67492		A0A059NTG7		c-like opsin	VFLSISL---NLVVLITFYRL-RQKLSF--KDALMASMALSDVVQAIIGYPLEVFTVVDGQ-WTFGMEL---------------CQVAA--FFITALGQVSIAHLTALALDRYFTVCRPFVATAIH-GSMRNAGLVIFFCWFYASFWAVLPLVGWSNYDV-EGDGMRCSINWADDSPKS-YSYRVCLFVFLYLIPVLIMGITYILVQGE---------------------------------------MKNM----------------------------RGRAAQLF---------------------------------------------------------------------------------------------------GSESEA------…	0.4841	passed	0.6968
2	Liegertová et al. (2015)	Transcriptome (454 pyrosequencing)	Protein	Assorted (refer to paper)	Assorted (refer to paper)	La Parguerra, Puerto Rico	Tcop9-GCO	Tripedalia	cystophora	AGB67496		A0A059NTG2		c-like opsin	VTASLIF---NMIVLVTFACI-KRRLTF--REVLFVSIALSDLLQALLGYTVEIVTTADGY-WSFGTLA---------------CQLVG--FVVTFLGLVSINHLALLALDRYMTVCHPRKTERIH-KYRINAIFFALLGWLYALLWAVPPILGWSNYAL-ESVKVRCSVNWKDESLAG-KGYVICLFVFGFLTHIITLIFCYYKIHKT---------------------------------------LVKL----------------------------SESNPPLD------------------------------------------------------D--------------------------------------------TGASPT------…	0.4876	passed	0.6699
2	Liegertová et al. (2015)	Transcriptome (454 pyrosequencing)	Protein	Assorted (refer to paper)	Assorted (refer to paper)	La Parguerra, Puerto Rico	Tcop5-GEO	Tripedalia	cystophora	AGB67500		A0A059NTD7		c-like opsin	ILLSTML---NGLVVFAMMKA-RNKLTF--RDIIHLSVALSDMIQGILGYPLEVISVLEGK-WQFGDAA---------------CAGTA--FMVTWLGLVSISHLVAMAIDRCLTICKPFTAHVLH-QKRIDALYFVIPSWLYGFFWAFTPLVGWGGYAN-EGLA-RCSIDWRVTDPIG-VSYIISLFVFCFVLPVAVMLMSFAAIRFE---------------------------------------LRKM----------------------------RHRSKSHF---------------------------------------------------------------------------------------------------GEDSES------…	0.4912	passed	0.9596
2	Nielsen et al. (2019)	Transcriptome (PacBio; Illumina X Ten)	TSA	Adult medusae	Complete animals	Cultured	Tcop13-LEO	Tripedalia	cystophora	GGWE01000952					VFLSISL---NLVVLITFYRL-RQKLSF--KDALMASMALSDVVQAIIGYPLEVFTVVDGQ-WTFGMEL---------------CQVAA--FFITALGQVSIAHLTALALDRYFTVCRPFVATAIH-GSMRNAGLVIFFCWFYASFWAVLPLVGWSNYDV-EGDGMRCSINWADDSPKS-YSYRVCLFVFLYLIPVLIMGITYILVQGE---------------------------------------MKNM----------------------------RGRAAQLF---------------------------------------------------------------------------------------------------GSESEA------…	0.4594	passed	0.6719
2	Nielsen et al. (2019)	Transcriptome (PacBio; Illumina X Ten)	TSA	Adult medusae	Complete animals	Cultured	Tcop9-GCO	Tripedalia	cystophora	GGWE01016199					---------------FSYVCMYKRRLTF--REVLFVSIALSDLLQALLGYTVEIVTTADGY-WSFGTLA---------------CQLVG--FVVTLLGLVSINHLALLALDRYMTVCHPRKTERIH-KYRINAIFFALLGWLYALLWAVPPILGWSNYAL-ESVKVRCSVNWKDESLAG-KGYVICLFVFGFLTHIITLIFCYYKIHKT---------------------------------------LVKL---	0.4823	passed	0.3842
2	Nielsen et al. (2019)	Transcriptome (PacBio; Illumina X Ten)	TSA	Adult medusae	Complete animals	Cultured	Tcop13-LEO	Tripedalia	cystophora	GGWE01022179					-----------------------------------------------------------GQ-WDIGMEL---------------CQVAA--FFITALGQVSIAHLTALALDRYFTVCRPFVATAIH-GSMRNAGLVIFFCWFYASFWAVLPLVGWSNYDV-EGDGMRCSINWADDSPKS-YSYRVCLFVFLYLIPVLIMGITYILVQGE---------------------------------------MKNM---	0.553	passed	0.728
2	Nielsen et al. (2019)	Transcriptome (PacBio; Illumina X Ten)	TSA	Adult medusae	Complete animals	Cultured	Tcop5-GEO	Tripedalia	cystophora	GGWE01022314					ILLSTML---NGLVVFAMMKA-RNKLTF--RDIIHLSVALSDMIQGILGYPLEVISVLEGK-WQFGDAA---------------CAGTA--FMVTWLGLVSISHLVAMAIDRCLTICKPFTAHVLH-QKRIDALYFVIPSWLYGFFWAFTPLVGWGGYAN-EGLA-RCSIDWRVTDPIG-VSYIISLFVFCFVLPVAVMLMSFAAIRFE---------------------------------------LRKM----------------------------RHRSKSHF---------------------------------------------------------------------------------------------------GEDSES------…	0.4611	passed	0.9913
2	Nielsen et al. (2019)	Transcriptome (PacBio; Illumina X Ten)	TSA	Adult medusae	Complete animals	Cultured	Tcop5-GEO	Tripedalia	cystophora	GGWE01023755					-----------------------------------------------------VISVLEGK-WQFGDAA---------------CAGTA--FMVTWLGLVSISHLVAMAIDRCLTICKPFTAHVLH-QKRIDALYFVIPSWLYGFFWAFTPLVGWGGYAN-EGLA-RCSIDWRVTDPIG-VSYIISLFVFCFVLPVAVMLMSFAAIRFE---------------------------------------LRKM---	0.5442	passed	0.9761
2	Nielsen et al. (2019)	Transcriptome (PacBio; Illumina X Ten)	TSA	Adult medusae	Complete animals	Cultured	Tcop13-LEO	Tripedalia	cystophora	GGWE01056550					--------------------------------------------------------------------------------------------------------------------------------------------------------------------------------------YRVCLFVFLYLIPVLIMGITYILVQGE---------------------------------------MKNM---	0.7332	passed	0.8805
2	Khalturin et al. (2019)	Transcriptome (Illumina MiSeq)	TSA	Assorted (refer to supplementary material of paper)	Assorted (refer to supplementary material of paper)	Costa Rica	Tcop5-GEO	Tripedalia	cystophora	GHAQ01026748	PRJNA498176				-----------------------------------------------------------------------------------------------------------------------------------------------GFFWAFTPLVGWGGYAN-EGLA-RCSIDWRVTDPIG-VSYIISLFVFCFVLPVAVMLMSFAAIRFE---------------------------------------LRKM---	0.6696	passed	0.9725
2	Khalturin et al. (2019)	Transcriptome (Illumina MiSeq)	TSA	Assorted (refer to supplementary material of paper)	Assorted (refer to supplementary material of paper)	Costa Rica	Tcop9-GCO	Tripedalia	cystophora	GHAQ01031653	PRJNA498176				------------------------------------------------------------------------------------------------LGLVSINHLALLALDRYMTVCHPRKTERIH-KYRINAIFFALLGWLYALLWAVPPILGWSNYAL-ESVKVRCSVNWKDESLAG-KGYVICLFVFGFLTHIITLIFCYYKIHKT---------------------------------------LVKL---	0.7067	passed	0.6283
2	Khalturin et al. (2019)	Transcriptome (Illumina MiSeq)	TSA	Assorted (refer to supplementary material of paper)	Assorted (refer to supplementary material of paper)	Costa Rica	Tcop13-LEO	Tripedalia	cystophora	GHAQ01079585	PRJNA498176				VFLSISL---NLVVLITFYRL-RQKLSF--KDALMASMALSDVVQAIIGYPLEVFTVVDGQ-WTFGMEL---------------CQVAA--FFITALGQVSIAHLTALALDRYFTVCRPFVATAIH-GSMRNAGLVIFFCWFYASFWAVLPLVGWSNYDV-EGDGMRCSINWADDSPKS-YSYRVCLFVFLYLIPVLIMGITYILVQGE---------------------------------------MKNM----------------------------RGRAAQLF---------------------------------------------------------------------------------------------------GSESEA------…	0.4594	passed	0.6719
1A	Ohdera et al. (2019)	WGS (Illumina)	WGS	Medusae	Complete animals	Caribbean		Alatina	alata	PUGI020000936	PRJNA421156		isolate RG 5287		VILGVAM---NSCVIISILIPRNLKIIT-PITIMVITMAFGDLTACIVAYPLGVVSLFGSG-WKVGDFS---------------CSFYG--FLCTLGGMNSVYQLTILSLERYCSLKYPMQFKTLR--TVVGCIIAAVISAIIASLFAILPLVGWSEYAP-EGLQFSCSIHWSNPSFES-RSYVVFLFVVGYFIPTSIQIYCNCQFLKE---------------------------------------MKII----------------------------VQGSVRRQ---------------------------------------------------------------------------------------------------GRKSSI------…	0.5	passed	0.6455
1A	Ohdera et al. (2019)	WGS (Illumina)	WGS	Medusae	Complete animals	Caribbean		Alatina	alata	PUGI020002451	PRJNA421156		isolate RG 5287		TVIGTLL---NSFVLVVFYRNRNRKDSN-LFNIFVLTIISVDAFTCITTYPLAVGSAFRRG-WIYGSVG---------------CNYYG--LMSTFGGINAIYQLTALSIERFLVFKKITYRSSRF--SGKKAIVAAAGLSACALIISLVPLTGLSPYEP-EGIKTHCSIRWASTELGD-RIYISTLMFVGFLFPVLLQIYCNSHFLKH---------------------------------------ITDM----------------------------FKRSEILC---------------------------------------------------------------------------------------------------GKNSSL------…	0.4523	passed	0.9741
1A	Ohdera et al. (2019)	WGS (Illumina)	WGS	Medusae	Complete animals	Caribbean		Alatina	alata	PUGI020012821	PRJNA421156		isolate RG 5287		TMMSILM---NGVTALTMIRHRKNLKGL---GWITFSLTIADIIGPSLAYPMSSIANFSKD-WIWGKVG---------------CFWYS--FISDFSEYASIFHILLLAIERYVSVVCPMHSHVFF--SKRALVKMLSGVWLISLSIAATTTFGMCNY---ERKTNMCHMNWQCDTIHG-IIYKLLLLSLCLLIPDLVMLYINSWIHIE---------------------------------------LCAM----------------------------TRRASLSQ---------------------------------------------------------------------------------------------------GIKSVM------…	0.4717	passed	0.5471
1A	Ohdera et al. (2019)	WGS (Illumina)	WGS	Medusae	Complete animals	Caribbean		Alatina	alata	PUGI020016280	PRJNA421156		isolate RG 5287		TVLGAVL---NAIVVFTILLTLKIKKVS-NMYIFLLSSAVVDFLASVTSYPLSAVSTYAGF-WKYGPVA---------------CNFYG--FMCTFSGMNTINQLTALSVERYTVMNNALRSSVMG--KKSVVWCIMTILTLVSLITATLPFTGWSSYTL-EGIKTSCSIDWSSTTNNS-KQFSVFLITFGFALPSLIQLVCNVRFMKL---------------------------------------VHEM----------------------------KVQSIATS---------------------------------------------------------------------------------------------------GRNSRI------…	0.4611	passed	0.2878
1A	Ohdera et al. (2019)	WGS (Illumina)	WGS	Medusae	Complete animals	Caribbean		Alatina	alata	PUGI020018268	PRJNA421156		isolate RG 5287		TVLAIVL---NGIVIYGLARFIRQLDLF---GVMVLNLALSDIIAPLSGYPLSAYSSFISK-WNWGTSG---------------CYWYG--FITSFAGYSSINHLMLLSVERYVTLVLPLRREEIL--SKTKVFLCLAGCWIFALMWAIAPVLGWNSYRL-EGIQTMCSVNWQSRETLD-VVFNVLLIILCFLVQECTIVFCHTATLKE---------------------------------------LKKM----------------------------SARAMEGH---------------------------------------------------------------------------------------------------GTNSQT------…	0.4876	passed	0.8913
1A	Ohdera et al. (2019)	WGS (Illumina)	WGS	Medusae	Complete animals	Caribbean		Alatina	alata	PUGI020022720	PRJNA421156		isolate RG 5287		TFLGITL---NGGTILISLKYNVFKDAV-TMKPLLLNGIILDLLMCIFTYPFAISASVTEK-WEFSDEL---------------CQFYA--FFHTFDATNSIFQLTGLALERFITITKPLKKKAIL--RGRRPLIMSLVLSSFALFIATLPLVGISKYGE-EGLKISCSVDWSLKTTSS-YVYIGILFIFGYSFPVSVQLFCNLRFLKA---------------------------------------IKTM----------------------------RRSSVILC---------------------------------------------------------------------------------------------------GRHSSL------…	0.4859	passed	0.6245
1A	Ohdera et al. (2019)	WGS (Illumina)	WGS	Medusae	Complete animals	Caribbean		Alatina	alata	PUGI020024903	PRJNA421156		isolate RG 5287		ASLGLIF---NGLVIIVLIKNVRNITNT---NIVVLSMAFAHLIVPTIGSPLSATSSLMRK-WQFKDAG---------------CVWYG--FVNTLSGIASIYHLTFLSVERYVTIVHPLKRDTLL--STRNVYIGVGVVWFLAVAVSIAPVFGWCSYVK-EGVQTSCSIDWNSRNNMNVYSYNIFLVVMVFLIPMMIIVYCNYRFIKE---------------------------------------VSVM----------------------------SSRARGLQ---------------------------------------------------------------------------------------------------GGDSEM------…	0.4788	passed	0.0922
1A	Ohdera et al. (2019)	WGS (Illumina)	WGS	Medusae	Complete animals	Caribbean		Alatina	alata	PUGI020035012	PRJNA421156		isolate RG 5287		CLLPVFL---NGLQGLTILLCKATFSPL---RCILLNLALADILGPLLGYHLSAASSFFHQ-WTWGYSV---------------CTWYG--FITSLSTYSSIGHGTLLYFERYCSTAHPMRKQELL--RKRNVLFATVVIWMVSLALSLFPLLANSSS---EGLPSLCHLNWNCNSVYA-YYGKLTFFPFFYLLPNFLILYFGTSVHLE---------------------------------------LDAM----------------------------AKRAADKQ---------------------------------------------------------------------------------------------------GKKSIL------…	0.4806	failed	0.0168
1A	Ohdera et al. (2019)	WGS (Illumina)	WGS	Medusae	Complete animals	Caribbean		Alatina	alata	PUGI020100828	PRJNA421156		isolate RG 5287		VVVGVVM---NTLVLLGIFRFYKDMDPY---STLILNQGICDLISPLAAYPLSLTSAFACE-WQYGHYF---------------CQYYG--FMTSFTGYASIFNLAAFSFERYVTFNYPLRRESIL--SKRNMFLAIALVWTSGFTWAIVPFWGASQYVK-EGIGTMCSVRWHSDNDRD-FYYSLSLIIGAYIVPMVTILACYKSFLRV---------------------------------------IYSL----------------------------MPRSRVL-----------------------------------------------------------------------------------------------------GNPEL------…	0.4664	passed	0.8192
1A	Ohdera et al. (2019)	WGS (Illumina)	WGS	Medusae	Complete animals	Caribbean		Alatina	alata	PUGI020298102	PRJNA421156		isolate RG 5287		SVLSAIL---NGLVCYCLIRSRRKMDSC---GVMLLSLSIADFISSTFAYPLSASACFYRT-WFHGQKW---------------CQFYG--FMTTLCGFSSMFHLMLLSAERYVSITKPLRKEQLM--ETRKALLYITASWLISLLWALMPLLGWNRYDK-EGLQTMCSIHWQADNNTE-LLYIIFIFIFCFLVPESGIILCNFYVYRE---------------------------------------IRSM----------------------------KRKAKFDQ---------------------------------------------------------------------------------------------------GMN---------…	0.6537	passed	0.5128
1A	Ohdera et al. (2019)	WGS (Illumina)	WGS	Medusae	Complete animals	Caribbean		Alatina	alata	PUGI020373558	PRJNA421156		isolate RG 5287		---GSIM---NSIVIIGLLRFRESLDMS---CAYIINQAITDITSPVFAYPLSATSSFGCS-WLYGYYG---------------CQYYG--FMTSYSGYASMINLAVLSVERYITLNFPLMREKIL--STRNIGGSIFIVHLTGIVWAIIPWFGVSAYVP-EGVGTMCSVLWHSGEQST-FLYNLLLILGVYVLPMVVIILCYSKFLRE---------------------------------------IYLI---	0.4876	passed	0.4072
1A	Helm, R., Ames, C. L., Pirro, S. and Collins, A. (unpublished). The complete genome sequence of Carybdea marsupialis auct. non. Direct Submission to NCBI.	WGS (Illumina)	WGS	Medusae	Complete animals	USA		Carybdea	cf. marsupialis	JAAAKL020001247	PRJNA493611		isolate IRGN 8SOK1XWZS6		SVLGTIM---NLVVLIGLLRYRKHLDIS---STLVMNQALCDLLPPMFCYPLSASSNFNSG-WMFGRAT---------------CVYYA--FTCSWAGYSSITNLTMLSLERFVTIVFPLRRERLL--TNRNIIICITIVWVYGFVWAVMPFFGISAYIP-EGIGTMCGVSWYGQDPMS-IAYHYGLILMVYVLPIAIIVCCYSKFLSE---------------------------------------ICKI----------------------------GLRASALQ---------------------------------------------------------------------------------------------------GQDSDM------…	0.4647	passed	0.7726
1A	Helm, R., Ames, C. L., Pirro, S. and Collins, A. (unpublished). The complete genome sequence of Carybdea marsupialis auct. non. Direct Submission to NCBI.	WGS (Illumina)	WGS	Medusae	Complete animals	USA		Carybdea	cf. marsupialis	JAAAKL020005210	PRJNA493611		isolate IRGN 8SOK1XWZS6		----------------------------------------------------------------------------------------GIGFF--------------------------------------------------------------------VGIGTSCGPRWTSSALPD-MSYNFFIFFVGYFIPMTVITLCHLRFLKE---------------------------------------ISRM---	0.7297	passed	0.9237
1A	Helm, R., Ames, C. L., Pirro, S. and Collins, A. (unpublished). The complete genome sequence of Carybdea marsupialis auct. non. Direct Submission to NCBI.	WGS (Illumina)	WGS	Medusae	Complete animals	USA		Carybdea	cf. marsupialis	JAAAKL020005986	PRJNA493611		isolate IRGN 8SOK1XWZS6		AVLSAIL---NGLVCYCLIRSRQSIDPG---GFMLLSLSIADLISPTLAYPFSASASFHRK-WYHGDFV---------------CQYYG--FLTTLCSFSSIYHLLLLSAERYISITRPLRKEKLI--GKRKTLFFIAFSWLISLFWATLPLLGWNSYYS-EGLQTMCSIHWQVDNHME-MTYVIAIFVFCFLVPHVGMIVFNFRVYQE---------------------------------------IRCM----------------------------KRKAKFDQ---------------------------------------------------------------------------------------------------GSHSRI------…	0.4876	passed	0.7168
1A	Helm, R., Ames, C. L., Pirro, S. and Collins, A. (unpublished). The complete genome sequence of Carybdea marsupialis auct. non. Direct Submission to NCBI.	WGS (Illumina)	WGS	Medusae	Complete animals	USA		Carybdea	cf. marsupialis	JAAAKL020008057	PRJNA493611		isolate IRGN 8SOK1XWZS6		TVIGAVL---NAVVLFTIVL--RIKRVS-NMYIFLLSIAFWDFVTCVSAYPLASVSTYHGV-WQYGEVA---------------CSFYG--FMCTLAGMNTINQLTALSVERYLVMKNALKASMMS--RKSVVWCIMAGLTLISLTYAVLPFTGWTSYKL-EGIKTSCSIDWTSSTIAT-KQFAFFLLTFGFALPSFIQLICNFKFLKL---------------------------------------VHQM----------------------------KVQSIATA---------------------------------------------------------------------------------------------------GRSSRI------…	0.4788	passed	0.7532
1A	Helm, R., Ames, C. L., Pirro, S. and Collins, A. (unpublished). The complete genome sequence of Carybdea marsupialis auct. non. Direct Submission to NCBI.	WGS (Illumina)	WGS	Medusae	Complete animals	USA		Carybdea	cf. marsupialis	JAAAKL020008068	PRJNA493611		isolate IRGN 8SOK1XWZS6		GALGIIF---NGLVIAVLIKNIRNITNT---NIVVLSMAFAHLIVPTIGSPLSITSSLMRK-WQFKDAG---------------CVWYG--FVNTLSGIASIYHLTFLSVERYVTLVHPLKRDTLL--STRNVYIGVGIVWFLATVVSIAPVFGWCSYVK-EGVQTSCSINWSSRSNINAYSYNIFMVVMVFLIPMMIIIYCNYRFIKE---------------------------------------VSVM----------------------------SSRARGLQ---------------------------------------------------------------------------------------------------GGDSEM------…	0.4841	passed	0.2798
1A	Helm, R., Ames, C. L., Pirro, S. and Collins, A. (unpublished). The complete genome sequence of Carybdea marsupialis auct. non. Direct Submission to NCBI.	WGS (Illumina)	WGS	Medusae	Complete animals	USA		Carybdea	cf. marsupialis	JAAAKL020011208	PRJNA493611		isolate IRGN 8SOK1XWZS6		FALPIFF---NGLQILTISLYRMKFKPL---RFIAFNLALADILGPLLAYHTSAVASHFHQ-WTWGHAL---------------CSWYG--FITSFATFASIGHVILLHFERYCSIVHPMRKWTLL--RKRNVITAVGLIWVVSLLESLWSVFADGKE---EQIPSVCHLNWHCKSVFA-HYYKLTFFLFLYMLPSFLLIYFDTSIYLE---------------------------------------LAAV----------------------------EKRVAVTH---------------------------------------------------------------------------------------------------GRKSVI------…	0.5018	passed	0.0609
1A	Helm, R., Ames, C. L., Pirro, S. and Collins, A. (unpublished). The complete genome sequence of Carybdea marsupialis auct. non. Direct Submission to NCBI.	WGS (Illumina)	WGS	Medusae	Complete animals	USA		Carybdea	cf. marsupialis	JAAAKL020013931	PRJNA493611		isolate IRGN 8SOK1XWZS6		VIIGSIM---NSVVIIGLLRFRESIDVS---CAYIISQAVTDIVSPLFAYPLSASSSFGCT-WLYGYYG---------------CQYYG--FVTSYAGYASMFNLAVLSVERYVTLNFPLVRERIL--SARNIGISIFILHISAAIWAIIPWFGVSAYVP-EGVGTMCSVLWHSGEQST-FLYNLLLILGVYVVPMLVIIFCYTKFLKE---------------------------------------IYMI----------------------------SPRASNL-----------------------------------------------------------------------------------------------------QSTNV------…	0.4912	passed	0.2765
1A	Helm, R., Ames, C. L., Pirro, S. and Collins, A. (unpublished). The complete genome sequence of Carybdea marsupialis auct. non. Direct Submission to NCBI.	WGS (Illumina)	WGS	Medusae	Complete animals	USA		Carybdea	cf. marsupialis	JAAAKL020017664	PRJNA493611		isolate IRGN 8SOK1XWZS6		VILGIAM---NSCVILSILTPRNLRNIS-PITVLVLSMAIGDLTMCVVAYPLGVISTFGSG-WKVGDFS---------------CSLYG--FLCTLGGINSVYQLTALSFERYFSVRFPMKLNSLS--TVQGSALVSILSALTACFVAILPLVGWSRYAP-EGFKTSCSIHWSGSSFES-RSYVVFLFLVGYLVPTSVQIYCNRKFLKE---------------------------------------LKSI----------------------------VSVSVRQQ---------------------------------------------------------------------------------------------------GRRSSI------…	0.4788	passed	0.8241
1A	Helm, R., Ames, C. L., Pirro, S. and Collins, A. (unpublished). The complete genome sequence of Carybdea marsupialis auct. non. Direct Submission to NCBI.	WGS (Illumina)	WGS	Medusae	Complete animals	USA		Carybdea	cf. marsupialis	JAAAKL020021627	PRJNA493611		isolate IRGN 8SOK1XWZS6		LIIAIFL---NSIVIYGLVKFFRQLDLS---GVMVLSLAVSDIIAPLSAYPLSAYSSLHSK-WQWGNRG---------------CYWYG--FMTTFAGLCSINHLMLLSIERYVTLVLPLRREEIL--SRNKVYLSLAGCWAFAFAWAIAPVVGWSSYRP-EGIQTMCSINWQSRSPSD-IIFNVLLIIFCFVVQDCAIVFCHFSTLKE---------------------------------------LKKM----------------------------TARAIEGH---------------------------------------------------------------------------------------------------GANSQT------…	0.4841	passed	0.9963
1A	Helm, R., Ames, C. L., Pirro, S. and Collins, A. (unpublished). The complete genome sequence of Carybdea marsupialis auct. non. Direct Submission to NCBI.	WGS (Illumina)	WGS	Medusae	Complete animals	USA		Carybdea	cf. marsupialis	JAAAKL020029101	PRJNA493611		isolate IRGN 8SOK1XWZS6		TFFGTFL---NITVIIIILRNRRKKSSN-LFNTFVFSIISVDTFACITSYPLSVASTFHRY-WIFGSLG---------------CNYYG--VISTFSGINAIYQLTALSLERFLSFKHSVRHSTWL--STKKASVAAISLSTLALFISVCPLTGLSPYEP-EGIKTYCSVRWSSSALGD-QIFICSLMVIGFLIPAFIQVYCHLHFLKY---------------------------------------ITSM----------------------------SKRSEIIC---------------------------------------------------------------------------------------------------GRNSLL------…	0.4735	passed	0.954
1A	Helm, R., Ames, C. L., Pirro, S. and Collins, A. (unpublished). The complete genome sequence of Carybdea marsupialis auct. non. Direct Submission to NCBI.	WGS (Illumina)	WGS	Medusae	Complete animals	USA		Carybdea	cf. marsupialis	JAAAKL020035223	PRJNA493611		isolate IRGN 8SOK1XWZS6		TFLGLAL---NGGTIYIVVRHNAFRDVM-TMRPFLLNGIILDFVTCAFTYPIAIAAAWAKK-WNFSDEV---------------CYFYA--FLHTFDAMNSIFQLTGLALERFITITKPLRRKVLL--RGRRPLIMALSLSMFALLLAILPIVGVSRYGL-EGLNISCSVNWSLKTLSS-YVYIGLLFVLGYCIPIGVQLFCNLRFLKT---------------------------------------VKVM----------------------------RRSSIVQH---------------------------------------------------------------------------------------------------GRHSSL------…	0.4682	passed	0.4266
1A	Helm, R., Ames, C. L., Pirro, S. and Collins, A. (unpublished). The complete genome sequence of Carybdea marsupialis auct. non. Direct Submission to NCBI.	WGS (Illumina)	WGS	Medusae	Complete animals	USA		Carybdea	cf. marsupialis	JAAAKL020053539	PRJNA493611		isolate IRGN 8SOK1XWZS6		VFVGVIM---NTLVLMAILRFYKEMDPY---SILVFSQGLCDLISPLIAYPLSLMSAFAGN-WLFGHQL---------------CKYYG--FITSFTGYASIFNLAAFSVERYITLSYPLQRENLL--SRRNMFIAIAVVWISGLVWAVIPFCGVSAYVR-EGVGIMCSVRWHSDDERD-FYYSITLILGAYILPMITILACYKSFLGV---------------------------------------IYSI----------------------------MPRSRVL-----------------------------------------------------------------------------------------------------GNEAL------…	0.5283	passed	0.6767
1A	Khalturin et al. (2019)	Transcriptome (Illumina MiSeq)	TSA	Medusae	Assorted (refer to supplementary material of paper)	Ishikawa fishing port, Ishikawa, Okinawa, Japan		Chironex	yamaguchii	GHAX01011373	PRJNA498168				VFVGVVM---NMIVILSFFRFYKDVDPY---SMLVCSQGFCDLLSPLLAYPMSFTSSINCS-WLYGPDM---------------CQYYG--FITSFTGYTSMFNLAALSVERFVTIRFPLRRETLL--KKRNVAIGIALVWIFGILWGLIPFLGISAYVK-EGLGTMCSVRWHSSDRRD-FHYCLSLILGAYFLPMVVIFLCYKCFLNV---------------------------------------IYSI----------------------------MPTARIL-----------------------------------------------------------------------------------------------------ANPDL------…	0.477	passed	0.9524
1A	Khalturin et al. (2019)	Transcriptome (Illumina MiSeq)	TSA	Medusae	Assorted (refer to supplementary material of paper)	Ishikawa fishing port, Ishikawa, Okinawa, Japan		Chironex	yamaguchii	GHAX01028778	PRJNA498171				--------------------------------------------------------SLHGT-WIWGKAG---------------CYWYG--FVTSFAGYSSINHLMLLSLERYITLVLPLKREQLL--RRKNIYFSLFCCWFASFAWAFLPVIGWNSYQL-EGIDTMCSVNWQTHNPRD-LSFNVLLLIFCFIFQETAIAYCYTAALKE---------------------------------------LKKM---	0.6237	passed	0.6288
1A	Khalturin et al. (2019)	Transcriptome (Illumina MiSeq)	TSA	Medusae	Assorted (refer to supplementary material of paper)	Ishikawa fishing port, Ishikawa, Okinawa, Japan		Chironex	yamaguchii	GHAX01047479	PRJNA498176				TILGVLF---NGLALVMIVRFNVVNGTR-CMKPFLLSSTFIDFITCASTYPLSVVSGFAGR-WCFSNQT---------------CTFYG--LINTLGAMNSIFQLTGLAIERYIALEQPFQTDIFF--KGKRPFLCAFCLFMFAVIIAILPLFGISSYSE-EGLGISCSINWHQQTVDN-YMYIGFMFFFGYFIPVAIQLFCNGKFLVS---------------------------------------IRRM----------------------------KKTSKHRY---------------------------------------------------------------------------------------------------GRRSSI------…	0.4841	passed	0.1415
1A	Khalturin et al. (2019)	Transcriptome (Illumina MiSeq)	TSA	Medusae	Assorted (refer to supplementary material of paper)	Ishikawa fishing port, Ishikawa, Okinawa, Japan		Chironex	yamaguchii	GHAX01047480	PRJNA498177				TILGVLF---NGLALVMIVRFNVVNGTR-CMKPFLLSSTFIDFITCASTYPLSVVSGFAGR-WCFSNQT---------------CTFYG--LINTLGAMNSIFQLTGLAIERYIALEQPFQTDIFF--KGKRPFLCAFCLFMFAVIIAILPLFGISSYSE-EGLGISCSINWHQQTVAN-YIYISLLFFLGYGIPVFIQFYSNGKFLLS---------------------------------------IRHI----------------------------RKASKSRY---------------------------------------------------------------------------------------------------GKHSVA------…	0.4841	passed	0.7491
1A	Khalturin et al. (2019)	Transcriptome (Illumina MiSeq)	TSA	Medusae	Assorted (refer to supplementary material of paper)	Ishikawa fishing port, Ishikawa, Okinawa, Japan		Chironex	yamaguchii	GHAX01053271	PRJNA498179				VLVGTTF---NLVVVIGLLRFRKNLDIS---SSLVLNQALCDLVAPMFGYPLSASSSFNCK-WLHGQRG---------------CLYYG--FVTSFGGYCSMFNLAALSVERFITIAYPLQRESIM--NQRTVSTCIASVWIFGFVWAVLPVIGISGYEP-EGIGTMCSVTWFAVNREA-IIYNIGLVVGVYFLPMAIIACCYCRFLSE---------------------------------------IFKI----------------------------GTRAAIFQ---------------------------------------------------------------------------------------------------GADSEM------…	0.4735	passed	0.7656
1A	Khalturin et al. (2019)	Transcriptome (Illumina MiSeq)	TSA	Medusae	Assorted (refer to supplementary material of paper)	Ishikawa fishing port, Ishikawa, Okinawa, Japan		Chironex	yamaguchii	GHAX01056937	PRJNA498181				TCFGSVI---NLFVIAILRRPGGHSKLK-VISVFVSTIVATDGVTCIAVYPLAVISTFYAR-WIFGRVG---------------CMFYG--FASTLSGMNTIFQLTALSVERYCCVNYPLTSTLWL--TTKNCLIVAILLCVLAFIIALCPLLGLSTYDL-EGIKTSCSIHWASSLPSS-RLFVIFLLIFGFVVPVIIQFYCNIYFLRS---------------------------------------ITYM----------------------------LDRSVETT---------------------------------------------------------------------------------------------------GRNSIM------…	0.4735	passed	0.6477
1A	Khalturin et al. (2019)	Transcriptome (Illumina MiSeq)	TSA	Medusae	Assorted (refer to supplementary material of paper)	Ishikawa fishing port, Ishikawa, Okinawa, Japan		Chironex	yamaguchii	GHAX01060947	PRJNA498183				VLIGGLM---NSIVILGMLRFYKCIDVS---SVLVISQAFCDVSCPLFAYPMSATSSFNCA-WLYGYYG---------------CQYYG--FFTSFAGYASMLNLTLLSVERYITLNFPLKREILL--SKTNMALALFAVYFSAAVWAIVPWFKISAYVM-EGVGTMCSVKWHSGESST-FWYNLLLTLGVYVVPMIIIAFCYAKFLRE---------------------------------------IYML----------------------------SSRASAL-----------------------------------------------------------------------------------------------------QNPSV------…	0.4929	passed	0.6423
1A	Khalturin et al. (2019)	Transcriptome (Illumina MiSeq)	TSA	Medusae	Assorted (refer to supplementary material of paper)	Ishikawa fishing port, Ishikawa, Okinawa, Japan		Chironex	yamaguchii	GHAX01064008	PRJNA498184				SILSIIL---NGLIIVALIRCKNKIGAM---GIITLSLAFADIIGPTLAYPLSSISNFFRV-WIWEDIG---------------CSWYG--FITTFGGYSSIFHVVFLSFERYISVNHPMLKDVLF--TKRNVIMSVISLWIMSWILSVIPIAGVCSY---KYFVSMCHLDWNCSSPYG-YVYKMALLIVCLIIPDLTMLFFYGRVCMG---------------------------------------LISM----------------------------RKRAAITQ---------------------------------------------------------------------------------------------------GSKSIM------…	0.5053	passed	0.7892
1A	Khalturin et al. (2019)	Transcriptome (Illumina MiSeq)	TSA	Medusae	Assorted (refer to supplementary material of paper)	Ishikawa fishing port, Ishikawa, Okinawa, Japan		Chironex	yamaguchii	GHAX01064010	PRJNA498185				CVVSSTL---NGLIIVALIRCKNKIGAM---GIITLSLAFADIIGPTLAYPLSSISNFFRV-WIWEDIG---------------CSWYG--FITTFGGYSSIFHVVFLSFERYISVNHPMLKDVLF--TKRNVIMSVISLWIMSWILSVIPIAGVCSY---KYFVSMCHLDWNCSSPYG-YVYKMALLIVCLIIPDLTMLFFYGRVCMG---------------------------------------LISM----------------------------RKRAAITQ---------------------------------------------------------------------------------------------------GSKSIM------…	0.5053	passed	0.9046
1A	Khalturin et al. (2019)	Transcriptome (Illumina MiSeq)	TSA	Medusae	Assorted (refer to supplementary material of paper)	Ishikawa fishing port, Ishikawa, Okinawa, Japan		Chironex	yamaguchii	GHAX01082776	PRJNA498192				VGFGILL---NLFVFAVLVSDRTDKSPS---TAIMISLSCNNLLGPLISYPLSLVANLKRG-WPFGSPV---------------CIWYG--FVGSLVGFGAIYHLTLLSIERYISLVHPLTRDRII--SKASLTAALSLAWILSFGISLLPVVGWGAYVN-EGIGTACSVRWYSDEGKD-LSYNLFIFIVGYFIPVIIIVLCHARFLKE---------------------------------------ISKL----------------------------ANRIQ------------------------------------------------------------------------------------------------------------------…	0.5018	passed	0.4701
1A	Khalturin et al. (2019)	Transcriptome (Illumina MiSeq)	TSA	Medusae	Assorted (refer to supplementary material of paper)	Ishikawa fishing port, Ishikawa, Okinawa, Japan		Chironex	yamaguchii	GHAX01082779	PRJNA498193				VGFGILL---NLFVFAVLVSDRTDKSPS---TAIMISLSCNNLLGPLISYPLSLVANLKRG-WPFGSPV---------------CIWYG--FVGSLVGFGAIYHLTLLSIERYISLVHPLTRDRII--SKASLTAALSLAWILSFGISLLPVVGWGA---------------YVNEGKS-LD-------------------------------------------------------------------------------------------------------------------------------------------------------------------------------------------------------------------------…	0.7314	passed	0.2515
1A	Khalturin et al. (2019)	Transcriptome (Illumina MiSeq)	TSA	Medusae	Assorted (refer to supplementary material of paper)	Ishikawa fishing port, Ishikawa, Okinawa, Japan		Chironex	yamaguchii	GHAX01082780	PRJNA498194				EDFSKLLKSANTILHSRL-------------TSLVLVGNCSFL--------------FLQR-WKGGKA-----------------------FEX---------HSXCPTLQKLMSI------------------------------------------------GTACSVRWYSDEGKD-LSYNLFIFIVGYFIPVIIIVLCHARFLKE---------------------------------------ISKL----------------------------ANRIQ------------------------------------------------------------------------------------------------------------------…	0.659	passed	0.8442
1A	Khalturin et al. (2019)	Transcriptome (Illumina MiSeq)	TSA	Medusae	Assorted (refer to supplementary material of paper)	Ishikawa fishing port, Ishikawa, Okinawa, Japan		Chironex	yamaguchii	GHAX01082781	PRJNA498195				SYLSICI-------------------------------------------------------------------------------------------------------------------------------------------------------------GTACSVRWYSDEGKD-LSYNLFIFIVGYFIPVIIIVLCHARFLKE---------------------------------------ISKL----------------------------ANRIQ------------------------------------------------------------------------------------------------------------------…	0.7314	passed	0.4578
1A	Khalturin et al. (2019)	Transcriptome (Illumina MiSeq)	TSA	Medusae	Assorted (refer to supplementary material of paper)	Ishikawa fishing port, Ishikawa, Okinawa, Japan		Chironex	yamaguchii	GHAX01101375	PRJNA498201				ASLGFFF---NALVIGVLIKNFRNITNT---NIIVLSMAFAHIIVPSIGSPLSATSSLMKG-WQFKDAG---------------CVWYG--FVNCLSGYCSIYHLTFLSVERYITIVHPLKRDTLL--NTRNTYIGIGIVWALAVAIAIAPVFGWCSYLR-EGVRTSCSVDWDSGENSNVFSYNVFLMVFTFLLPMIVIIYCNYRFIKE---------------------------------------VSVM----------------------------SSRARGLQ---------------------------------------------------------------------------------------------------GGDSEM------…	0.4682	passed	0.82
1A	Khalturin et al. (2019)	Transcriptome (Illumina MiSeq)	TSA	Medusae	Assorted (refer to supplementary material of paper)	Ishikawa fishing port, Ishikawa, Okinawa, Japan		Chironex	yamaguchii	GHAX01101376	PRJNA498202				ASLGFFF---NALVIGVLIKNFRNITNT---NIIVLSMAFAHIIVPSIGSPLSATSSLMKG-WQFKDAG---------------CVWYG--FVNCLSGYCSIYHLTFLSVERYITIVHPLKRDTLL--NTRNTYIGIGIVWALAVAIAIAPVFGWCSYLR-EGVRTSCSVDWDSGENSNVFSYNVFLMVFTFLLPMIVIIYCNYRFIKE---------------------------------------VSVM----------------------------SSRARGLQ---------------------------------------------------------------------------------------------------GGDSEM------…	0.4894	passed	0.7373
1A	Khalturin et al. (2019)	Transcriptome (Illumina MiSeq)	TSA	Medusae	Assorted (refer to supplementary material of paper)	Ishikawa fishing port, Ishikawa, Okinawa, Japan		Chironex	yamaguchii	GHAX01125934	PRJNA498204				-------------------------------------------------------SSFRHS-WTFGDLG---------------CKWYG--FVTTWCGFCSTNHLVLLSIERYISIAKPLHKEQVL--SREKMFHYLVFCWCCSLFMALLPIFGWSQYTL-EGVKTMCSIDWASRERHG-LSYVLTIFFLCFVIPQACIIYCNIHVFWE---------------------------------------IRAM---	0.5866	passed	0.1386
1A	Ames, C. L. and Pirro, S. (unpublished). The complete genome sequence of Chironex yamaguchii, the Viper Jellyfish. Direct Submission to NCBI.	WGS (Illumina)	WGS	Medusae	Tentacle	Naha Port, Okinawa, Japan		Chironex	yamaguchii	JANTCA010000449	PRJNA764276		isolate IRGN CYG001		VAVGVTS---NTITTWVFKRIYWKNSGS--TNLLILSLSVCNLSQNLLTYPLNVIACSQHG-WFLGEHA---------------CLADALLFXVHWMAITSIAHLVALSVDRYFSVF----SRKWY--KASYVWYIVACCWLYGFTWSLMPLVGWSHYTL-EGLNISCSVSFKSQDINS-KSYSIVLMLTNFVLPFGLIAIFYSLIYRG---------------------------------------IRLQ-N----------------------------KIM--------------------------------------------------------------------------------------------------TNA-RADKVK------…	0.4664	passed	0.998
1A	Ames, C. L. and Pirro, S. (unpublished). The complete genome sequence of Chironex yamaguchii, the Viper Jellyfish. Direct Submission to NCBI.	WGS (Illumina)	WGS	Medusae	Tentacle	Naha Port, Okinawa, Japan		Chironex	yamaguchii	JANTCA010002681	PRJNA764276		isolate IRGN CYG001		VFVGVVM---NMIVILSFFRFYKDVDPY---SMLVCSQGFCDLLSPLLAYPMSFTSSINCS-WLYGPDM---------------CQYYG--FITSFTGYTSMFNLAALSVERFVTIRFPLRRETLL--KKRNVAIGIALVWIFGILWGLIPFLGISAYVK-EGLGTMCSVRWHSSDRRD-FHYCLSLILGAYFLPMVVIFLCYKCFLNV---------------------------------------IYSI----------------------------MPTARIL-----------------------------------------------------------------------------------------------------ANPDL------…	0.477	passed	0.9524
1A	Ames, C. L. and Pirro, S. (unpublished). The complete genome sequence of Chironex yamaguchii, the Viper Jellyfish. Direct Submission to NCBI.	WGS (Illumina)	WGS	Medusae	Tentacle	Naha Port, Okinawa, Japan		Chironex	yamaguchii	JANTCA010012147	PRJNA764276		isolate IRGN CYG001		ASLGFFF---NALVIGVLIKNFRNITNT---NIIVLSMAFAHIIVPSIGSPLSATSSLMKG-WQFKDAG---------------CVWYG--FVNCLSGYCSIYHLTFLSVERYITIVHPLKRDTLL--NTRNTYIGIGIVWALAVAIAIAPVFGWCSYLR-EGVRTSCSVDWDSGENSNVFSYNVFLMVFTFLLPMIVIIYCNYRFIKE---------------------------------------VSVM----------------------------SSRARGLQ---------------------------------------------------------------------------------------------------GGDSEM------…	0.4682	passed	0.82
1A	Ames, C. L. and Pirro, S. (unpublished). The complete genome sequence of Chironex yamaguchii, the Viper Jellyfish. Direct Submission to NCBI.	WGS (Illumina)	WGS	Medusae	Tentacle	Naha Port, Okinawa, Japan		Chironex	yamaguchii	JANTCA010012466	PRJNA764276		isolate IRGN CYG001		VLVGTTF---NLVVVIGLLRFRKNLDIS---SSLVLNQALCDLVAPMFGYPLSASSSFNCK-WLHGQRG---------------CLYYG--FVTSFGGYCSMFNLAALSVERFITIAYPLQRESIM--NQRTVSTCIASVWIFGFVWAVLPVIGISGYEP-EGIGTMCSVTWFAVNREA-IIYNIGLVVGVYFLPMAIIACCYCRFLSE---------------------------------------IFKI----------------------------GTRAAIFQ---------------------------------------------------------------------------------------------------GADSEM------…	0.4735	passed	0.7656
1A	Ames, C. L. and Pirro, S. (unpublished). The complete genome sequence of Chironex yamaguchii, the Viper Jellyfish. Direct Submission to NCBI.	WGS (Illumina)	WGS	Medusae	Tentacle	Naha Port, Okinawa, Japan		Chironex	yamaguchii	JANTCA010013967	PRJNA764276		isolate IRGN CYG001		VLIGGLM---NSIVILGMLRFYKCIDVS---SVLVISQAFCDVSCPLFAYPMSATSSFNCA-WLYGYYG---------------CQYYG--FFTSFAGYASMLNLTLLSVERYITLNFPLKREILL--SKTNMALALFAVYFSAAVWAIVPWFKISAYVM-EGVGTMCSVKWHSGESST-FWYNLLLTLGVYVVPMIIIAFCYAKFLRE---------------------------------------IYML----------------------------SSRASAL-----------------------------------------------------------------------------------------------------QNPSV------…	0.4929	passed	0.6423
1A	Ames, C. L. and Pirro, S. (unpublished). The complete genome sequence of Chironex yamaguchii, the Viper Jellyfish. Direct Submission to NCBI.	WGS (Illumina)	WGS	Medusae	Tentacle	Naha Port, Okinawa, Japan		Chironex	yamaguchii	JANTCA010038805	PRJNA764276		isolate IRGN CYG001		CILGITL---NGFVIIVLLKNIGKLQLT---DMLVLGMTASNFLMCFTGVPFAVISSFYRK-WMFGNHG---------------CVWYG--FICSLTGYSLIFHIMLLSIERYISIVHSLQREKYL--SKDRILLSIALVWTFSAALAIGPILGWSSYIL-EGVQISCSVDWKFNSSANGLSYHLLLITICYLLPMVVIIYCSYKFMKE---------------------------------------LNVM----------------------------CLRAKDLH---------------------------------------------------------------------------------------------------GPNSEI------…	0.4965	passed	0.7615
1A	Ames, C. L. and Pirro, S. (unpublished). The complete genome sequence of Chironex yamaguchii, the Viper Jellyfish. Direct Submission to NCBI.	WGS (Illumina)	WGS	Medusae	Tentacle	Naha Port, Okinawa, Japan		Chironex	yamaguchii	JANTCA010040261	PRJNA764276		isolate IRGN CYG001		VGFGILL---NLFVFAVLVSDRTDKSPS---TAIMISLSCNNLLGPLISYPLSLVANLKRG-WPFGSPV---------------CIWYG--FVGSLVGFGAIYHLTLLSIERYISLVHPLTRDRII--SKASLTAALSLAWILSFGISLLPVVGWGAYVN-EGKGTACSVRWYSDEGKD-LSYNLFIFIVGYFIPVIIIVLCHARFLKE---------------------------------------ISKL----------------------------ANRIQ------------------------------------------------------------------------------------------------------------------…	0.5018	passed	0.4976
1A	Ames, C. L. and Pirro, S. (unpublished). The complete genome sequence of Chironex yamaguchii, the Viper Jellyfish. Direct Submission to NCBI.	WGS (Illumina)	WGS	Medusae	Tentacle	Naha Port, Okinawa, Japan		Chironex	yamaguchii	JANTCA010046802	PRJNA764276		isolate IRGN CYG001		VVLGSGI---NSRVIFSILRPSNIGQIK-AIAIPVLSMAVGDLLTCILAYPMAIMSSSFSS-LQNEKVI---------------CSIYG--FTCTFSGLNSIYQLTALSAERYISLRHPFDENVLS--TLRGSLLVTLLFMLMSGLLAVLPLVGWNEYLP-EGVKLGCSVNWAASSVDG-RLYVLFLFLSGYFIPCLVQFFCNYHFLKD---------------------------------------INIL----------------------------TDNSKCQH---------------------------------------------------------------------------------------------------GRRSHL------…	0.5035	passed	0.7527
1A	Ames, C. L. and Pirro, S. (unpublished). The complete genome sequence of Chironex yamaguchii, the Viper Jellyfish. Direct Submission to NCBI.	WGS (Illumina)	WGS	Medusae	Tentacle	Naha Port, Okinawa, Japan		Chironex	yamaguchii	JANTCA010065915	PRJNA764276		isolate IRGN CYG001		--VGTIM---NLVVFIGILRFRKKFDVS---AALVLNQALCDLVAPMFGYSLSASSSFSCK-WLHGFRT---------------CTYYG--FVTSFGGYCSIFNLTALSVERFVTTRFPFQRERFI--NRTSMAISVSCVWLLGFTWAVLPVFGISGYMP-EGVGTMCSITWFADEPEA-KLFNMALVINVYFIPMSIIICCYVRFLCE---------------------------------------LTKM---	0.5194	passed	0.9316
1A	Ames, C. L. and Pirro, S. (unpublished). The complete genome sequence of Chironex yamaguchii, the Viper Jellyfish. Direct Submission to NCBI.	WGS (Illumina)	WGS	Medusae	Tentacle	Naha Port, Okinawa, Japan		Chironex	yamaguchii	JANTCA010075119	PRJNA764276		isolate IRGN CYG001		IVLAILL---NSIVLYGFARHKKQLEVL---AIIVFSLAVSDIIAPMCAYPLSAYASLHGT-WIWGKAG---------------CYWYG--FVTSFAGYSSINHLMLLSLERYITLVLPLKREQLL--RRKNIYFSLFCCWFASFAWAFLPVIGWNSYQL-EGIDTMCSVNWQTHNPRD-LSFNVLLLIFCFIFQETAIAYCYTAALKE---------------------------------------LQKM----------------------------TLKARQDN---------------------------------------------------------------------------------------------------GHNSQT------…	0.4894	passed	0.6496
1A	Ames, C. L. and Pirro, S. (unpublished). The complete genome sequence of Chironex yamaguchii, the Viper Jellyfish. Direct Submission to NCBI.	WGS (Illumina)	WGS	Medusae	Tentacle	Naha Port, Okinawa, Japan		Chironex	yamaguchii	JANTCA010079710	PRJNA764276		isolate IRGN CYG001		TCFGSVI---NLFVIAILRRPGGHSKLK-VISVFVSTIVATDGVTCIAVYPLAVISTFYAR-WIFGRVG---------------CMFYG--FASTLSGMNTIFQLTALSVERYCCVNYPLTSTLWL--TTKNCLIVAILLCVLAFIIALCPLLGLSTYDL-EGIKTSCSIHWASSLPSS-RLFVIFLLIFGFVVPVIIQFYCNSYFLRS---------------------------------------ITYM----------------------------LDRSVETT---------------------------------------------------------------------------------------------------GRNSIM------…	0.4682	passed	0.6557
1A	Ames, C. L. and Pirro, S. (unpublished). The complete genome sequence of Chironex yamaguchii, the Viper Jellyfish. Direct Submission to NCBI.	WGS (Illumina)	WGS	Medusae	Tentacle	Naha Port, Okinawa, Japan		Chironex	yamaguchii	JANTCA010080906	PRJNA764276		isolate IRGN CYG001		---------------------------------------FADIIGPTLAYPLSSISNFFRV-WIWEDIG---------------CSWYG--FITTFGGYSSIFHIVFLSFERYISVNHPMLKDVLF--TKKNVIMSVISLWIMSWILSVIPIAGVCSY---KYFVSMCHLDWSCSSPYG-YVYKMALLIVCLIIPDLTMLFFYGRVCMG---------------------------------------LISM---	0.6555	passed	0.8385
1A	Ames, C. L. and Pirro, S. (unpublished). The complete genome sequence of Chironex yamaguchii, the Viper Jellyfish. Direct Submission to NCBI.	WGS (Illumina)	WGS	Medusae	Tentacle	Naha Port, Okinawa, Japan		Chironex	yamaguchii	JANTCA010082140	PRJNA764276		isolate IRGN CYG001		AAFSSVL---NVLVSYCLLYATKKHDTC---GLIIFSLSISDFLSPTFGYPLAAISSFRHS-WTFGDLG---------------CKWYG--FVTTWCGFCSTNHLVLLSIERYISIAKPLHKEQVL--SREKMFHYLVFCWCCSLFMALLPIFGWSQYTL-EGVKTMCSIDWASRERHG-LSYVLTIFFLCFVIPQACIIYCNIHVFWE---------------------------------------IRAM----------------------------KSRAMVSQ---------------------------------------------------------------------------------------------------GEKSRI------…	0.5	passed	0.3356
1A	Khalturin et al. (2019)	Transcriptome (Illumina MiSeq)	TSA	Medusae	Complete animals	Maeda fishing port, Onna, Okinawa, Japan		Copula	sivickisi	GHBG01043300	PRJNA498767				--------------------------AK-SMRPFLLSEIGLDLLTCLTTYPLSVSSSFASE-WYYGQQV---------------CIFYG--FQNTWASMNSIFQLTGLAVERYITLTQPFEKHAFI--GGKRPTVVAISLTFFSFLIAALPFAGIGNYST-EGLKISCSIDWHSRTTRD-YICFGTLFLLGYILPVSTQLICNVRFLQV---------------------------------------LRLM---	0.6378	passed	0.7029
1A	Khalturin et al. (2019)	Transcriptome (Illumina MiSeq)	TSA	Medusae	Complete animals	Maeda fishing port, Onna, Okinawa, Japan		Copula	sivickisi	GHBG01083961	PRJNA498769				TVASVIL---NGTIVFVLFKYRRKVKPI---SVLTLNLAIADGIGPLLAYPLSSISNFSKQ-WLWGKAG---------------CNWYG--FVISLGGYSSIFHIVALAFERYISICCPIRKPYFL--RKRNVYLLSTCAWIISFLLSIAPSLGVCGY---KDVSSMCHIDWTCGSLQG-RIYKMSLLPLCLFVPDFLLVVLFSRIYIN---------------------------------------LNAM----------------------------SRRAGNTQ---------------------------------------------------------------------------------------------------GRKSLM------…	0.5406	passed	0.8558
1A	Khalturin et al. (2019)	Transcriptome (Illumina MiSeq)	TSA	Medusae	Complete animals	Maeda fishing port, Onna, Okinawa, Japan		Copula	sivickisi	GHBG01089281	PRJNA498770				ALTGPAM---NATVLISVLLPRNLRRIK-PMSIFVLLMAVGDFLICAIANPVGILINLKSG-FTSGGQV---------------CSLYG--FICTFGGINSVYQLTGLSLERYHTLRHPFHPSIFN--TMGGCLLSGIIFVVFSSILAIMPLFGWSMYSR-EGIGLSCSVQWRGNTVES-KIYIMILFIAGYTIPTCIQIFCNFKFLSL---------------------------------------LGAL----------------------------VRDSIKRS---------------------------------------------------------------------------------------------------GRVSLI------…	0.4965	passed	0.3894
1A	Khalturin et al. (2019)	WGS (Illumina MiSeq)	WGS	Adult male	Gonads	Ondo Fishing Port, Hiroshima Prefecture, Japan		Morbakka	virulenta	RDPX01000029	PRJNA494059		isolate OFP		NIVGTVM---NLVVLIGLFRHRKYVEIK---SAFVMNQAACDLVAPIFGYPLSASSTLYCS-WLYGHQA---------------CIFYG--FVTSFGGYCSILNLALLSVERYITLSHPLKRESLI--NNRNIFLSISCIWIFGFFWAILPVIGVSSYKP-EGIGTMCSVTWFSEDTDS-IVFTLSLVIGVYLLPMGIIIFCHFRFLLE---------------------------------------IFSI----------------------------RSRASNLH---------------------------------------------------------------------------------------------------GQDSEI------…	0.4611	passed	0.8449
1A	Khalturin et al. (2019)	WGS (Illumina MiSeq)	WGS	Adult male	Gonads	Ondo Fishing Port, Hiroshima Prefecture, Japan		Morbakka	virulenta	RDPX01000100	PRJNA494059		isolate OFP		----------NGIAIYLILFCGAFREAV-SMKPLLLNGMIVDQAICLLSYIFSIWSAFSGS-WSFTDDI---------------CTYYG--FMTTFDAMNSIFQLTGLAFERYTTINMPMRSYIIL--GRNKATGLSLVLTCFAFLLSVIPLTKWSNFHQ-EGLGISCSIDWELHTQSN-YVYVGILFVAGYLLPVSLQLYFNFRFLNA---------------------------------------VKRM---	0.4664	passed	0.8859
1A	Khalturin et al. (2019)	WGS (Illumina MiSeq)	WGS	Adult male	Gonads	Ondo Fishing Port, Hiroshima Prefecture, Japan		Morbakka	virulenta	RDPX01000129	PRJNA494059		isolate OFP		TISAILL---NGIAIYVLIKRFQQLYWS---DVIVLSLSICDLIAPASGYPLAVYSSINKT-WMWNKAR---------------CYWYG--FINTFTGLSAINHLMLLSLERYISLVLPFRKQDLV--TKPKVLIAILICWSLALVFAGAPVFGWNSYKVGEGMNSRCSINWKSHNSVD-LSYTVFLLLFGFLWQEILMLYCHFATLRE---------------------------------------IKRM----------------------------ILRASATC---------------------------------------------------------------------------------------------------GQNSQE------…	0.4611	passed	0.7159
1A	Khalturin et al. (2019)	WGS (Illumina MiSeq)	WGS	Adult male	Gonads	Ondo Fishing Port, Hiroshima Prefecture, Japan		Morbakka	virulenta	RDPX01000224	PRJNA494059		isolate OFP		---GVTT---WRL-------------PFWTPTILVLSQCICDLLSPLIAYPLSLRSAMNCT-WLYGSKW---------------SYYYG--FVTSFTGYTSIFNLTAFSIERFVTFKFSLRREXFL--SNRKMTILLATVWISGFLWALMPLLGISAYVK-EGIGTVCSVRWHSDDRRD-YYYSLSLLTGVYVLPMTMIGVCYKWYIGA---------------------------------------IYSF---	0.5495	passed	0.8694
1A	Khalturin et al. (2019)	WGS (Illumina MiSeq)	WGS	Adult male	Gonads	Ondo Fishing Port, Hiroshima Prefecture, Japan		Morbakka	virulenta	RDPX01000260	PRJNA494059		isolate OFP		VFFGTLM---NACVIISILCPRNLRSLK-PMAVLVLFMAFGDFSICVFAYPLGIDAALRQY-WDKQQYT---------------CNFYG--FLCTFGGINSVYQLTGLSLERHFSIKYPWMDSIFS--TVRGCILFSAFAVLAALMFAGLPLVGWSKYSP-EGLSFSCSIQWGEKSAEA-TTYIIFLFTVGYIIPSAIQLYCNLQFLKE---------------------------------------IRNI----------------------------VRGSIKSQ---------------------------------------------------------------------------------------------------GQKSRI------…	0.4753	passed	0.7883
1A	Khalturin et al. (2019)	WGS (Illumina MiSeq)	WGS	Adult male	Gonads	Ondo Fishing Port, Hiroshima Prefecture, Japan		Morbakka	virulenta	RDPX01000393	PRJNA494059		isolate OFP		ACLALLF---NSLVVFVLVKNIRTITNT---NIIVLSMSICNLLIPCLGSPMSSTSSLMRK-WQFGDAG---------------CVWYG--FINTLSGISGIYHLTFLSFERYITIVHPMKRELIL--STKNVYIGVAITWALSVVVCIPPVFGWCSYVR-EGVRTFCSVEWGSMANPNVFSYNMFMMVIAYIIPIVVILYCNHQFIKE---------------------------------------VSVI----------------------------SARARGLQ---------------------------------------------------------------------------------------------------GGESEM------…	0.4965	passed	0.1342
1A	Khalturin et al. (2019)	WGS (Illumina MiSeq)	WGS	Adult male	Gonads	Ondo Fishing Port, Hiroshima Prefecture, Japan		Morbakka	virulenta	RDPX01001632	PRJNA494059		isolate OFP		TCFGTFS---NITILVIVCRNKDRRKGD-VRNIFLTHMIVINTFSCILAYPLSTVSTYRKQ-WIFGNAV---------------CAYYG--FLSTFDGFNSIFQLTVLSVERYWKIKYPMTSHWFY--SKSKSRKLSLVFSLISLFIALCPLWGLSSYQE-EGIGTYCSITWNSPKLKD-RVFILFLLIFIYAFPSSVQIFCNYKFLSL---------------------------------------IRNM----------------------------KNRSTVTN---------------------------------------------------------------------------------------------------GKRSNI------…	0.4823	passed	0.3382
1A	Collins, A. and Pirro, S. (unpublished). The complete genome sequence of Tamoya ohboya. Direct Submission to NCBI.	WGS (Illumina)	WGS	Medusae	Bell	Dutch Caribbean		Tamoya	ohboya	JAOTRP010101240	PRJNA676141		isolate 5EI4VPYLNR		------------------------------------------------------------Q-WVFGNIG---------------CNFYG--FLSTFAGMNTIYQLTALSFERYWILNHKMLLNQKS--SSRKSVIGVIILVILSLIIAICPLIGFSNYKP-EGIGTYCSLNWSSAVLKD-RIFIILLMIFGFITPSVIQIFLNRGFLRS---------------------------------------ISRM---	0.5618	passed	0.1309
1A	Liegertová et al. (2015)	Transcriptome (454 pyrosequencing)	Protein	Assorted (refer to paper)	Assorted (refer to paper)	La Parguerra, Puerto Rico	Tcop14	Tripedalia	cystophora	AGB67491		A0A059NTG1		c-like opsin	CLFGSLL---NGVSLLVICRYKIFKESK-SMKPFLLSGIGLDLVTCLFTYPLSISSSFATK-WSHSDQA---------------CTFYG--FVNTWAAINSIFQLTGLAFDRYVTLTRPFQKLSML--GGRRPLIFAVALTFTSLLIAVLPFTGLSSYSK-EGLQVSCSIDWIRNSTND-YIYYGVLFILGYLMPVSVQLICNLRFIRV---------------------------------------LKVM----------------------------SHVSKEKY---------------------------------------------------------------------------------------------------GRRSSL------…	0.4894	passed	0.6167
1A	Liegertová et al. (2015)	Transcriptome (454 pyrosequencing)	Protein	Assorted (refer to paper)	Assorted (refer to paper)	La Parguerra, Puerto Rico	Tcop11	Tripedalia	cystophora	AGB67494		A0A059NTC6		c-like opsin	VVVGVIM---NMCVIIGILRFFKRMDPY---LMLVLSQGFCDLLSPLVAYPLSLASSFACT-WLFGDGW---------------CYYYG--FVTSFAGYTSIFNLTAFAVERYVTFKFPLKRERVL--SKRNMIIMISLVWIAGFVWAALPLMGISAYVK-EGIGTMCSVRWHSDDSSD-FYYSLSLIICAYLLPVFIILMCYKSFLGI---------------------------------------IYSI----------------------------MPRSRIL-----------------------------------------------------------------------------------------------------GNPEL------…	0.4929	passed	0.905
1A	Liegertová et al. (2015)	Transcriptome (454 pyrosequencing)	Protein	Assorted (refer to paper)	Assorted (refer to paper)	La Parguerra, Puerto Rico	Tcop7	Tripedalia	cystophora	AGB67498		A0A059NTD3		c-like opsin	ALLSSIL---NGLVIFSLWKSMKNIDTC---GLMLLSLSVNDFLSPTFGYPMAAYASLQHK-WIYGDDG---------------LQMVW--IISAFSGFGSLHHLMLLSGERFISITKPLKKEQLL--SNNRTRYLIIFCWSSSLVWATFPLVGWNGYTL-EGLQTMCSVNWQSKDAVE-VSYIVSILVCCFLIPQIGIIYFNACILLE---------------------------------------IRCM----------------------------KKKARIEQ---------------------------------------------------------------------------------------------------GVNSSI------…	0.4894	passed	0.8843
1A	Liegertová et al. (2015)	Transcriptome (454 pyrosequencing)	Protein	Assorted (refer to paper)	Assorted (refer to paper)	La Parguerra, Puerto Rico	Tcop6	Tripedalia	cystophora	AGB67499		A0A059NTC7		c-like opsin	LILAVLL---NGMVIYGLAKYYKQLDFS---GIIVLSLSISDITAPICAYPLSAYSSLQAV-WKFGDNG---------------CYWYG--FVTTLTGLCSINHLMLLSIERYITLVLPLRREELL--DKTKVLVAIAFCWIFSFCWAIAPVFGWSEYRL-EGIKTMCSINWQSRSSLD-FAYNILLFILCFLVQEIVIIFCHQRTLRE---------------------------------------VKKM----------------------------TLRAVGTH---------------------------------------------------------------------------------------------------GSNSQT------…	0.4894	passed	0.9658
1A	Liegertová et al. (2015)	Transcriptome (454 pyrosequencing)	Protein	Assorted (refer to paper)	Assorted (refer to paper)	La Parguerra, Puerto Rico	Tcop1	Tripedalia	cystophora	AGB67504		A0A059NTC8		c-like opsin	VVIGAIM---NSVVIFGLLRFRRDVDLS---SSFIISQAFCDIICPLFAYPLSASSGFNCS-WLYGYYG---------------CQYYG--FVTSYAGYASIFNLAVLSVERFVTLNYPLSRERMI--NRQNVTLAIVTLHTTAAVWAIIPWFGVSAYIP-EGVGTMCSVQWHSDDDST-FLYSIFLIVGAYILPMMIIIYVYGRFLHE---------------------------------------IYLL----------------------------FPRASSF-----------------------------------------------------------------------------------------------------NNQEI------…	0.4929	passed	0.4494
1A	Kozmik et al. (2008)	Sanger sequencing	Nucleotide	Medusae	Rhopalia	La Parguerra, Puerto Rico	Tcop18-NEO	Tripedalia	cystophora	EU310498				c-opsin-like mRNA, partial sequence	ACCSFLL---NGLVIAVLIKYIRTITNT---NIIVLSMSCANILIPLLGSPLSATSSLMRK-WQFGNGG---------------CTWYG--FINTLSGISGIYHLTFLSFERFITIVLPLKRDTIL--STKNIYIGLGILWVAAIGVAGAPVFGWCEYIK-EGVRTSCSVAWSSKENMNVFSYNLFMIFTVFLLPMLVIIYCNYRFIKE---------------------------------------VSIM----------------------------STRARGLQ---------------------------------------------------------------------------------------------------GGDSEM------…	0.4947	passed	0.5494
1A	Nielsen et al. (2019)	Transcriptome (PacBio; Illumina X Ten)	TSA	Adult medusae	Complete animals	Cultured	Tcop18-NEO	Tripedalia	cystophora	GGWE01004146					----------------------------------------------------------------------------------------------------------------------------IL--STKNIYIGLGILWVAAIGVAGAPVFGWCEYIK-EGVRTSCSVAWSSKENMNVFSYNLFMIFTVFLLPMLVIIYCNYRFIKE---------------------------------------VSIM---	0.6714	passed	0.6027
1A	Khalturin et al. (2019)	Transcriptome (Illumina MiSeq)	TSA	Assorted (refer to supplementary material of paper)	Assorted (refer to supplementary material of paper)	Costa Rica	Tcop1	Tripedalia	cystophora	GHAQ01004133	PRJNA498176				----------------------------------------------------------------------------------------------------------------------------------QNVTLAIVTLHTAAAVWAIIPWFGVSAYIP-EGVGTMCSVQWHSDDDST-FLYSIFLIVGAYILPMMIIIYAYGRFLHE---------------------------------------IYLL---	0.6749	passed	0.6279
1A	Khalturin et al. (2019)	Transcriptome (Illumina MiSeq)	TSA	Assorted (refer to supplementary material of paper)	Assorted (refer to supplementary material of paper)	Costa Rica	Tcop11	Tripedalia	cystophora	GHAQ01006285	PRJNA498176				VVVGVIM---NMCVIIGILRFFKRMDPY---LMLVLSQGFCDLLSPLVAYPLSLASSFACT-WLFGDGW---------------CYYYG--FVTSFAGYTSIFNLTAFAVERYVTFKFPLKRERVL--SKRNMIIMISLVWIAGFVWAALPLMGISAYVK-EGIGTMCSVRWHSDDSSD-FYYSLSLIICAYLLPVFIILMCYKSFLGI---------------------------------------IYSI----------------------------MPRSRIL-----------------------------------------------------------------------------------------------------GNPEL------…	0.4876	passed	0.9203
1A	Khalturin et al. (2019)	Transcriptome (Illumina MiSeq)	TSA	Assorted (refer to supplementary material of paper)	Assorted (refer to supplementary material of paper)	Costa Rica		Tripedalia	cystophora	GHAQ01018064	PRJNA498176				--------------------------------------------------------------------------------------------------------------------------------------------WLFGFLWAILPVFGISSYEP-EGIGTMCSVTWFLDSNIA-LMYNAALVIAVYCLPMSIIAGCYFKFLSE---------------------------------------IFKI---	0.7085	passed	0.5019
1A	Khalturin et al. (2019)	Transcriptome (Illumina MiSeq)	TSA	Assorted (refer to supplementary material of paper)	Assorted (refer to supplementary material of paper)	Costa Rica	Tcop18-NEO	Tripedalia	cystophora	GHAQ01032471	PRJNA498176				ACCSFLL---NGLVIAVLIKYIRTITNT---NIIVLSMSCANILIPLLGSPLSATSSLMRK-WQFGNGG---------------CTWYG--FINTLSGISGIYHLTFLSFERFITIVLPLKRDTIL--STKNIYIGLGILWVAAIGVAGAPVFGWCEYIK-EGVRTSCSVAWSSKENMNVFSYNLFMIFTVFLLPMLVIIYCNYRFIKE---------------------------------------VSIM----------------------------STRARGLQ---------------------------------------------------------------------------------------------------GGDSEM------…	0.4947	passed	0.5494
1A	Khalturin et al. (2019)	Transcriptome (Illumina MiSeq)	TSA	Assorted (refer to supplementary material of paper)	Assorted (refer to supplementary material of paper)	Costa Rica	Tcop18-NEO	Tripedalia	cystophora	GHAQ01032473	PRJNA498176				ACCSFLL---NGLVIAVLIKYIRTITNT---NIIVLSMSCANILIPLLGSPLSATSSLMRK-WQFGNGG---------------CTWYG--FINTLSGISGIYHLTFLSFERFITIVLPLKRDTIL--STKNIYIGLGILWVAAIGVAGAPVFGWCEYIK-EGVRTSCSVAWSSKENMNVFSYNLFMIFTVFLLPMLVIIYCNYRFIKE---------------------------------------VSIM----------------------------STRARGLQ---------------------------------------------------------------------------------------------------GGDSEM------…	0.4947	passed	0.5494
1A	Khalturin et al. (2019)	Transcriptome (Illumina MiSeq)	TSA	Assorted (refer to supplementary material of paper)	Assorted (refer to supplementary material of paper)	Costa Rica		Tripedalia	cystophora	GHAQ01044357	PRJNA498176				VVLGAVL---NLFVFTVLITHRSKISYA---GIIMTSMSFCNLLGPIFSYPLSVVANFKKG-WHLGSFL---------------CTWYG--FNGALVGFCTIYHLMLLSVERYISMVYPLTRDRII--SKTSLTLSLVISWMVSLIIAVLPVAGWSAYEP-EGVGTSCGPRWTAPE-------------------------------------------------------------------------------------------------------------------------------------------------------------------------------------------------------------------------------…	0.7367	passed	0.7691
1A	Khalturin et al. (2019)	Transcriptome (Illumina MiSeq)	TSA	Assorted (refer to supplementary material of paper)	Assorted (refer to supplementary material of paper)	Costa Rica		Tripedalia	cystophora	GHAQ01044359	PRJNA498176				--------------------------------------------------------------------------------------------------------------------------------------------------------------------------RWTAPETLD-VTYKLFMLFLGYIFPMSVVSFCHSRFLKE---------------------------------------ISKM---	0.7385	passed	0.1728
1B	Ohdera et al. (2019)	WGS (Illumina)	WGS	Medusae	Complete animals	Caribbean		Alatina	alata	PUGI020001553	PRJNA421156		isolate RG 5287		TIFGAIT---NGLVIVIFCSLYKKTPSS--FNGLVISTAISDFLLMTVSGPINAASAFKRH-FVFGETG---------------CRFLG--FWVHFMAVTSVAHLTVLSYERCCLISHKSGQRTVS---IGRNFALIGFCWVYSLVWAILPLFGWSKYVP-EGIGISCSISWDSHAPSD-LSFSIIIMICEFIIPLAVMIWCYIKIFYT---------------------------------------IRRN-----------------------------------------------------------------------------------------------------------------------------------IHN-ETESPT------…	0.4823	passed	0.9772
1B	Ohdera et al. (2019)	WGS (Illumina)	WGS	Medusae	Complete animals	Caribbean		Alatina	alata	PUGI020005401	PRJNA421156		isolate RG 5287		SILGALL---NVFVVLFFVRLYKREGRL--INLLICSTATSDLLPSVLAYPLAALRTLQHSAYEDGNIA---------------CNLEG--FCIHMTALSSVVHLAAMAYERYSVIKSGTSK----IFSVKNQFFIVAMIWFYSLLVSILPFMGWSSYHP-EGIQTSCTVNWKSNKTED-VSYSTLLLFTNFIFPFIVIVLSYIGLYKY---------------------------------------VRTN-SF--------------------------SKSW--------------------------------------------------------------------------------------------------NDS-QVGRHF------…	0.4647	passed	0.9844
1B	Ohdera et al. (2019)	WGS (Illumina)	WGS	Medusae	Complete animals	Caribbean		Alatina	alata	PUGI020005590	PRJNA421156		isolate RG 5287		FIVGLFM---NSLVVIIFRRLYKRSKNA--TNLLIVSLSWCNLF-HVSTYPLNIIASFQNK-WSLGDSA---------------CQADA--FFVHFMAITSITHLVGLALERFLSMTGKTFTKST-----IFRVAIVSFCWIYGLAWSIMPLLGWSEYQP-EGLHISCSVTFSSTDKGH-LSYIICIFIFDYIIPVILILFFYSKIYLL---------------------------------------IKKH-N----------------------------ASV--------------------------------------------------------------------------------------------------FAT-NNS-SG------…	0.4859	passed	0.9303
1B	Ohdera et al. (2019)	WGS (Illumina)	WGS	Medusae	Complete animals	Caribbean		Alatina	alata	PUGI020010069	PRJNA421156		isolate RG 5287		ILATIPP---NVIIIVVFSKFYSRRPGL--INMLIISVALNNILIACLAYPMAAVSNFQQK-WIFGDDG---------------CQFYG--FCVHVFTLSTISQLAIVSYRQWSIVRLTTIKRNFL--SLNRQLFVVFCSWLYGFLWSVPPYIGWSKYVP-EGIGTSCSVAWESMKVED-TSYTASLLVSNFLLPFSVIVYSYGRIWNR---------------------------------------LRGH---------------------------------------------------------------------------------------------------------------------------------------------------…	0.6714	passed	0.8997
1B	Ohdera et al. (2019)	WGS (Illumina)	WGS	Medusae	Complete animals	Caribbean		Alatina	alata	PUGI020013236	PRJNA421156		isolate RG 5287		TLFGIPA---NLLVIYVFSKIYKSCPTT--INMMIVSITITDFMLIAYAGPVHTASYILGR-WYMGNFG---------------CQFYG--FWVHFTSVASLTHLTIISLERYQVVKNNIKKDKRP---FWKQLALVSIAWIYAIFWAILPFFGWSSYEL-EGVHTGCAPKWVSRKLID-VTYNIALIFSEFVFPLMIIIWAYWKLFQK---------------------------------------IKEH-N----------------------------VSM--------------------------------------------------------------------------------------------------FVA-NPSEQV------…	0.4753	passed	0.6012
1B	Ohdera et al. (2019)	WGS (Illumina)	WGS	Medusae	Complete animals	Caribbean		Alatina	alata	PUGI020015840	PRJNA421156		isolate RG 5287		FLLGLIL---NGVVIILFKSIYKSTNTC--TNLLILSISYCNLF-HVLTYPLNIISSFQKK-WEFGQTA---------------CRVDA--FWVHWMAITTISHLAMLSVDRYLTVMGKNIITAK-----SYKYCTVYGCWIYGFIWSMLPFVGWSDYEL-EGIGASCSAKFGSSAIED-ISYDIVLFIFDFFLPLVIIIVSYIAIYRH---------------------------------------LRRH-N----------------------------EAV--------------------------------------------------------------------------------------------------YGG-HSELSG------…	0.4806	passed	0.9856
1B	Ohdera et al. (2019)	WGS (Illumina)	WGS	Medusae	Complete animals	Caribbean		Alatina	alata	PUGI020026618	PRJNA421156		isolate RG 5287		TCIGTPS---NLVVTIIFIRLCRKKRST--VNFLITSITISDLFMIGYAGPVHTYMYYKRK-WTLGKFG---------------CSFYG--FWVHATSVASLTHLAVLSVERYQVVKLKKQSDTRS---LLSQLSFAGFAWLYAIFWATLPLFGWSEYAE-EGMHTGCAPKWLSRNVTD-ITYNVTLIVSEFLLPLAIIIVAYTKLARK---------------------------------------IKEH-S----------------------------KSM--------------------------------------------------------------------------------------------------SGN-SSLENA------…	0.4682	passed	0.9418
1B	Ohdera et al. (2019)	WGS (Illumina)	WGS	Medusae	Complete animals	Caribbean		Alatina	alata	PUGI020030891	PRJNA421156		isolate RG 5287		TVFGSFG---NMAVTYVFCGIYKSRPSC--FNALVVSTSISDLLMIFVSGTACTASAIAKR-FLFGDLG---------------CDILG--FWVHLLSVSSIAHLSALSIERYYLLRTRNDKNPES---LRKTGLVVCCCWLYSILWAVPPLFGWSSYTR-EGMQISCSVYWEGKDAAT-MSYNIAIMFSEFFVPLGAIFYCYFKLFKT---------------------------------------VRES-----------------------------------------------------------------------------------------------------------------------------------RAT-EEGSPN------…	0.5035	passed	0.7922
1B	Ohdera et al. (2019)	WGS (Illumina)	WGS	Medusae	Complete animals	Caribbean		Alatina	alata	PUGI020035086	PRJNA421156		isolate RG 5287		SLLGAIL---NLMVIIVFIKLYRKDHKF--LNMMIISTAVSDLLPSVLSYPLTAYRTHQKKGYKLNSSE---------------CSFEG--FCIQLAALVSVSHLALMAYERYIVITSGMSR----VLSPKWHLAITISVWLYGILVSSMPLVGWSSYQP-EGLETSCTVYWTSRDTLD-ISFNTILMLADFLIPLIIICYSYTKVWLF---------------------------------------TRHN-GL--------------------------KKRW--------------------------------------------------------------------------------------------------VDS-SVNIQR------…	0.4523	passed	0.635
1B	Ohdera et al. (2019)	WGS (Illumina)	WGS	Medusae	Complete animals	Caribbean		Alatina	alata	PUGI020038015	PRJNA421156		isolate RG 5287		TIVGFIA---NALVVYIFIRIYKYNQIT--INLLIISTALCDASMIVVAGPLHAASYIEGH-WDFGHSG---------------CQFYG--FWVHFTSVGSLSNLVLIAVERYLVVKNNVIKDTKS---VVTQVLLTIGALFYGLFWSSLPLFGWSSYTL-EGLNTGCAPNWVSRDFTD-VSYNVVLILTEFCLPVGIITYAYIKMVQL---------------------------------------MKNH-S----------------------------KVL--------------------------------------------------------------------------------------------------SKM-EAGLSN------…	0.47	passed	0.9931
1B	Ohdera et al. (2019)	WGS (Illumina)	WGS	Medusae	Complete animals	Caribbean		Alatina	alata	PUGI020040167	PRJNA421156		isolate RG 5287		FVLGLIL---NLIIIIIFRTIYKESPTC--TNMLILSISYCNLL-HIVTYPLNIIASFQRI-WDFGAVA---------------CRVDA--FFVHWMSITSMAHLTMLSVDRYVKVVGKPITNEV-----RYKILVLVGCWSYGLLWALLPLFGWSSYGL-EGVGISCSIQFGSPRMLD-VAYELTLFVTDFLLPLGVIIFCQLAVVRK---------------------------------------LRIH-N----------------------------AEL--------------------------------------------------------------------------------------------------NDG-TDEGED------…	0.47	passed	0.7157
1B	Ohdera et al. (2019)	WGS (Illumina)	WGS	Medusae	Complete animals	Caribbean		Alatina	alata	PUGI020649536	PRJNA421156		isolate RG 5287		---------------------------------------------------------------DFGQKG---------------CVFDA--FWVHWMAITSISHLTMLALDRYLVMNKRNLNKSN-----YYKYAVVIGCWFYGMFWSAMPLVGWSQYGL-EGIGIGCSIVFGSTKIED-ISYNIVVFVTNFALPILIIACCYLAIYRG---------------------------------------VREH-H-	0.6608	passed	0.9029
1B	Helm, R., Ames, C. L., Pirro, S. and Collins, A. (unpublished). The complete genome sequence of Carybdea marsupialis auct. non. Direct Submission to NCBI.	WGS (Illumina)	WGS	Medusae	Complete animals	USA		Carybdea	cf. marsupialis	JAAAKL020000407	PRJNA493611		isolate IRGN 8SOK1XWZS6		AIFGALT---NGLVIIIFCNLYKRSPSS--FNALVISTGVSDFLLITVSGPINAASALKKQ-FVFGQAG---------------CRFLG--FWVHFMSVTSVAHLAALSFERYSLMSQKSGRRLVS---AGRTFALIAICWAYSLVWAILPLFGWSTYIP-EGIGISCSISWNSQAPFD-ISFSIIIMVSEFIVPLAIMAGCYVKIYRT---------------------------------------VQKN-----------------------------------------------------------------------------------------------------------------------------------INN-DSESPN------…	0.4929	passed	0.4662
1B	Helm, R., Ames, C. L., Pirro, S. and Collins, A. (unpublished). The complete genome sequence of Carybdea marsupialis auct. non. Direct Submission to NCBI.	WGS (Illumina)	WGS	Medusae	Complete animals	USA		Carybdea	cf. marsupialis	JAAAKL02000258	PRJNA493611		isolate IRGN 8SOK1XWZS6		TVFGVPV---NGMVVYIFSRMYKREARV--FNLIMISHSLSDLLLIAVAGPTRIIAYVRGV-STLSKTE---------------CKLYG--VWVHITSVSSLTHLMLLAMERYRIIRQRKMPETGA---FFKQAMVPLVAWLYAAFWAILPILGWSEYAP-ESQHVGCAPKWGSKAILD-VSYNITIMFFEFFFPLAVILFLYFKIFGL---------------------------------------IKSA-K-------------------------------------------------------------------------------------------------------------------------------------EEDASS------…	0.4859	passed	0.7623
1B	Helm, R., Ames, C. L., Pirro, S. and Collins, A. (unpublished). The complete genome sequence of Carybdea marsupialis auct. non. Direct Submission to NCBI.	WGS (Illumina)	WGS	Medusae	Complete animals	USA		Carybdea	cf. marsupialis	JAAAKL020008064	PRJNA493611		isolate IRGN 8SOK1XWZS6		TIVGIVA---NALVVYIFIRIYKHNRIT--INILIISTALCDASMIAVTGPLHAASYIQGH-WQLGHAG---------------CQFYG--FWVHFTSVSSLSNLVVIAIERYLVIKNNVFKDTKT---FSTQLFLTIGALLYGLLWSSLPLLGWSSYTL-EGLNTGCAPNWVSRNLND-VTYNVVLMLTEFCLPLGVIVYAYIKMVQL---------------------------------------MQSH-S----------------------------RVL--------------------------------------------------------------------------------------------------SKM-EANLNN------…	0.47	passed	0.9616
1B	Helm, R., Ames, C. L., Pirro, S. and Collins, A. (unpublished). The complete genome sequence of Carybdea marsupialis auct. non. Direct Submission to NCBI.	WGS (Illumina)	WGS	Medusae	Complete animals	USA		Carybdea	cf. marsupialis	JAAAKL020011565	PRJNA493611		isolate IRGN 8SOK1XWZS6		FLIGFVL---NGSFILLFHSIYKKRRSC--TNLLIFSLSICNLL-HVFSYPLNFVAAFRRA-WDFGKIG---------------CIFDA--FWVHWMAITSISHLTMLAVDRYIIMNRRNLNNST-----LYKACVVTGCWLYGLFWSAMPLLGWSSYGR-EGIGIGCSIVFSSVRSAD-VSYSIVVFITNFALPILVITCCYVAIYRV---------------------------------------IRQH-H----------------------------SQV--------------------------------------------------------------------------------------------------TDG-SVKPNE------…	0.4841	passed	0.9882
1B	Helm, R., Ames, C. L., Pirro, S. and Collins, A. (unpublished). The complete genome sequence of Carybdea marsupialis auct. non. Direct Submission to NCBI.	WGS (Illumina)	WGS	Medusae	Complete animals	USA		Carybdea	cf. marsupialis	JAAAKL020015340	PRJNA493611		isolate IRGN 8SOK1XWZS6		TLSTIPS---NILVVLIFSKIYVRRPGL--INLLVMSVSVNNILQACIAYPMAVASNFERK-WLFGKDG---------------CTFYG--FCVHMFALSTICQLAVVAYRQWRTIRLKTIKRDFL--SLKRQVYVVVATWLYGILWSVPPYFGWSRYVP-EGIGTSCSVAWESKDPVD-ASYTLALLLSNFVIPFIVIVYSYTRIWKK---------------------------------------LKRH---------------------------------------------------------------------------------------------------------------------------------------------------…	0.6714	passed	0.9394
1B	Helm, R., Ames, C. L., Pirro, S. and Collins, A. (unpublished). The complete genome sequence of Carybdea marsupialis auct. non. Direct Submission to NCBI.	WGS (Illumina)	WGS	Medusae	Complete animals	USA		Carybdea	cf. marsupialis	JAAAKL020019749	PRJNA493611		isolate IRGN 8SOK1XWZS6		SILGFIL---NFLVIIVFIKLYRKDCKF--LNLMIVSTAVSDLLPSICSYPLTAYRTHQKRSYPFNSVE---------------CSFEG--FSIQLAALVSVSHLALMAYERYIVITSGISR----VLSPRWHLGITASVWLYGILVSSMPLLGWSSYQP-EGLETSCTVHWTSRDNLD-MSFNAILMLTDFFIPFLVICYSYTRLWLF---------------------------------------TRHN-GL--------------------------KKRW--------------------------------------------------------------------------------------------------VDS-SVNVQR------…	0.4664	passed	0.7692
1B	Helm, R., Ames, C. L., Pirro, S. and Collins, A. (unpublished). The complete genome sequence of Carybdea marsupialis auct. non. Direct Submission to NCBI.	WGS (Illumina)	WGS	Medusae	Complete animals	USA		Carybdea	cf. marsupialis	JAAAKL020024242	PRJNA493611		isolate IRGN 8SOK1XWZS6		SVLGGIL---NGFVVLFFFRLYKRERRL--INLLIWSTATSDLLPSIFAYPLAALRTLQQNPYSSENLA---------------CKLEG--FCIHMTALSSVMHLAAMAYERYSVIKSGTSK----IFSVKRQYIIVALIWAYSFSVSIMPFFGWSSYQP-EGIQTSCTVNWKSNDAED-VSYSGLLLFTNFIFPFTVIVLSYIGLYKY---------------------------------------VRTN-SF--------------------------AKQW--------------------------------------------------------------------------------------------------NDS-QICRDF------…	0.4717	passed	0.995
1B	Helm, R., Ames, C. L., Pirro, S. and Collins, A. (unpublished). The complete genome sequence of Carybdea marsupialis auct. non. Direct Submission to NCBI.	WGS (Illumina)	WGS	Medusae	Complete animals	USA		Carybdea	cf. marsupialis	JAAAKL020024402	PRJNA493611		isolate IRGN 8SOK1XWZS6		FLLGLIL---NGVIILLFRAIYKSTKTC--TNLLILSISYCNLF-HVLTYPLNIVSSFQKK-WEFGETA---------------CRVDA--FWVHWMAITTISHLAMLSVDRYLTVLGKGVINMK-----AYKNFAVVSCWLYGLLWSILPLVGWSDYEL-EGIGASCSAKFGSSSMED-ISYDITLFVFDFFLPLLVITVSYILIYGH---------------------------------------LRRH-N----------------------------QAL--------------------------------------------------------------------------------------------------YGN-QPDLSG------…	0.4806	passed	0.997
1B	Helm, R., Ames, C. L., Pirro, S. and Collins, A. (unpublished). The complete genome sequence of Carybdea marsupialis auct. non. Direct Submission to NCBI.	WGS (Illumina)	WGS	Medusae	Complete animals	USA		Carybdea	cf. marsupialis	JAAAKL020024527	PRJNA493611		isolate IRGN 8SOK1XWZS6		FVLGLFM---NSLVVIIFRRIYKRTKNT--TNLLIVSLSYCNLL-HVATYPLNIIASFQTR-WSIGDSA---------------CQTDA--FFVHFMALTSIAHLVALAMERFLSMTGKTFSKTS-----VFRVGLVCFCWLYGFFWSVMPLFGWSEYKP-EGLHFSCSVTFSSRNTNH-MSYVISIFLFNYVIPITLIVFFYSRIYLL---------------------------------------IKKH-N----------------------------ATV--------------------------------------------------------------------------------------------------FAS-KNS-SE------…	0.4859	passed	0.7481
1B	Helm, R., Ames, C. L., Pirro, S. and Collins, A. (unpublished). The complete genome sequence of Carybdea marsupialis auct. non. Direct Submission to NCBI.	WGS (Illumina)	WGS	Medusae	Complete animals	USA		Carybdea	cf. marsupialis	JAAAKL020025198	PRJNA493611		isolate IRGN 8SOK1XWZS6		TIFGSIG---NLLVVYVFCLIYKARPSC--FNALVISTSFSDFLMIFVSGTACVASSIAKR-FLFGDLG---------------CKILG--FWVHLLAASSIAHLAALSIERYYLLKTRNKKNPEA---LTRTLLIVGCCWAYSFLWALPPLFGWSSYIL-EGIEISCSVDWEAKNSAS-VSYNIAIMFAEFFCPLAAIFYFYYKLFKT---------------------------------------VREA-----------------------------------------------------------------------------------------------------------------------------------RTG-EASSPS------…	0.4982	passed	0.2583
1B	Helm, R., Ames, C. L., Pirro, S. and Collins, A. (unpublished). The complete genome sequence of Carybdea marsupialis auct. non. Direct Submission to NCBI.	WGS (Illumina)	WGS	Medusae	Complete animals	USA		Carybdea	cf. marsupialis	JAAAKL020044997	PRJNA493611		isolate IRGN 8SOK1XWZS6		TLFGIPA---NLLVIYVFSKIYRSAPTT--INLMIVSITITDFMLIAFAGPVHTASYVLGR-WYLGHYG---------------CQFYG--FWVHFTSVASLTHLAVISLERYQVVKNNLKKDQRP---FWKQMALISIAWFYAIFWAVLPFLGWSSYEL-EGVHTGCAPKWVSRALVD-VTYNIALIFTEFAFPLLIIIGAYWKLFRK---------------------------------------IKEH-N----------------------------INM--------------------------------------------------------------------------------------------------SAA-NPSEQG------…	0.4753	passed	0.7347
1B	Helm, R., Ames, C. L., Pirro, S. and Collins, A. (unpublished). The complete genome sequence of Carybdea marsupialis auct. non. Direct Submission to NCBI.	WGS (Illumina)	WGS	Medusae	Complete animals	USA		Carybdea	cf. marsupialis	JAAAKL020048278	PRJNA493611		isolate IRGN 8SOK1XWZS6		FVLGLIL---NIVVVILFRVIYNESPNC--TNMLTLSMSYCNIL-HCVTYPLNIVASFQKM-WDFGPEA---------------CEADA--FFVHWMSITTIAHLTMLSVDRYIKVTGKRIPNKV-----HYKRGILIGCWLYGFLWAILPLLGWSKYDL-EGIGISCSIKFGSPLLQD-IAYELTIFVTDFVFPLTIIIVCQLAVFRN---------------------------------------IRLH-N----------------------------LEL--------------------------------------------------------------------------------------------------NDG-NEDAEN------…	0.4859	passed	0.6312
1B	Helm, R., Ames, C. L., Pirro, S. and Collins, A. (unpublished). The complete genome sequence of Carybdea marsupialis auct. non. Direct Submission to NCBI.	WGS (Illumina)	WGS	Medusae	Complete animals	USA		Carybdea	cf. marsupialis	JAAAKL020060938	PRJNA493611		isolate IRGN 8SOK1XWZS6		SSFGIPS---NLIVTVIFLKLYRSHPST--ISLLIVSTTISDLFMIGFAGPVHAYMYYKRK-WTFGKFG---------------CTFYG--FWVHLTSVASLTHLSVLSTERYHIVKHNKQSETRP---RHAQLCLSGIAWVYATFWASLPLIGWSEYVE-EGLDTGCAPKWVSRDIVD-VTYNITLIIAEFLIPIAIIIVAYIKLVRK---------------------------------------LDEH-S----------------------------KSI--------------------------------------------------------------------------------------------------SRQ-QTLAIA------…	0.4664	passed	0.8018
1B	Khalturin et al. (2019)	Transcriptome (Illumina MiSeq)	TSA	Medusae	Assorted (refer to supplementary material of paper)	Ishikawa fishing port, Ishikawa, Okinawa, Japan		Chironex	yamaguchii	GHAX01006833	PRJNA498167				----------------------KSHPTC--FHGLLISTAISDFLMIIVAGPINVASNAKGY-FVLGDKC---------------CKFYG--FWVHFMSVTSIAHLVALSFERQSIISNTKAKLSSP---FRKILLLSGCSWIYSFIWAILPIFGWSHYTV-EGIGTSCSVAWISHKPVD-MSFNIVIIFSEFVIPLGAIIACYWKLYTT---------------------------------------VKKH---	0.5159	passed	0.6313
1B	Khalturin et al. (2019)	Transcriptome (Illumina MiSeq)	TSA	Medusae	Assorted (refer to supplementary material of paper)	Ishikawa fishing port, Ishikawa, Okinawa, Japan		Chironex	yamaguchii	GHAX01017438	PRJNA498170				-------------------------------------------------------------------------------------------------------HLTMLSVDRYVSVSRRQVNKLT-----WYKYSVVAGCWVYGFLWSTLPLVGWSEYEL-EGIGISCSAKFGSVKIED-ISYDIILFIFDFLLPLSIIALCHVGIYAR---------------------------------------IRKH-N-	0.6184	passed	0.9626
1B	Khalturin et al. (2019)	Transcriptome (Illumina MiSeq)	TSA	Medusae	Assorted (refer to supplementary material of paper)	Ishikawa fishing port, Ishikawa, Okinawa, Japan		Chironex	yamaguchii	GHAX01036290	PRJNA498172				VAVGVTS---NTITTWVFKRIYWKNSGS--TNLLILSLSVCNLSQNLLTYPLNVIACSQHG-WFLGEHA---------------CLADA--FFVHWMAITSIAHLVALSVDRYFSVF----SRKWY--KASYVWYIVACCWLYGFTWSLMPLVGWSHYTL-EGLNISCSVSFKSQDINS-KSYSIVLMLTNFVLPFGLIAIFYSLIYRG---------------------------------------IRLQ-N----------------------------KIM--------------------------------------------------------------------------------------------------TNA-RADKVK------…	0.4682	passed	0.9974
1B	Khalturin et al. (2019)	Transcriptome (Illumina MiSeq)	TSA	Medusae	Assorted (refer to supplementary material of paper)	Ishikawa fishing port, Ishikawa, Okinawa, Japan		Chironex	yamaguchii	GHAX01036292	PRJNA498173				-----------------------------------------------------------------------------------------------------------------------------------YVWYIVACCWLYGFTWSLMPLVGWSHYTL-EGLNISCSVSFKSQDINS-KSYSIVLMLTNFVLPFGLIAIFYSLIYRG---------------------------------------IRLQ-N-	0.6484	passed	0.9995
1B	Khalturin et al. (2019)	Transcriptome (Illumina MiSeq)	TSA	Medusae	Assorted (refer to supplementary material of paper)	Ishikawa fishing port, Ishikawa, Okinawa, Japan		Chironex	yamaguchii	GHAX01044440	PRJNA498174				TCFGIPA---NILVIYIFCKIYKSGPTT--INMIIISTTVTDLMLISFAGPIHTLAYAKGK-WILGHFG---------------CQFYG--FWVHFTSVASLSHLTVISVERYLVVKNNIKNDGRS---FWHQAALVSTAWLYAIFWAILPFFGWSSYAL-EGVHTGCAPKWVSRELID-VSYNIVLIFTEFIIPLIIIIYAYLKLYDK---------------------------------------VKRH-N----------------------------STM--------------------------------------------------------------------------------------------------LTK-CSSQQA------…	0.4753	passed	0.6095
1B	Khalturin et al. (2019)	Transcriptome (Illumina MiSeq)	TSA	Medusae	Assorted (refer to supplementary material of paper)	Ishikawa fishing port, Ishikawa, Okinawa, Japan		Chironex	yamaguchii	GHAX01044684	PRJNA498175				MIIGFPA---NVIVIFAFYRIYTNNPCT--INMLIISSSISNVLLIVVILPMQIALYSNRQ-EKFGAEA---------------CQFYG--FWAHFTAVASLCHLTSISIQRYILMKYPKKITLER---LKHQVYTVVFSWAYAAVFALLPFLGWSEYDY-EGIHTGCAPKWHSKSMQD-VSYNILLLIFEFCFPLTLITVCHIRLFQR---------------------------------------VVRH-N----------------------------RIMMR----------------------------------------------------------------------------------------------------KETLED------…	0.4682	passed	0.7737
1B	Khalturin et al. (2019)	Transcriptome (Illumina MiSeq)	TSA	Medusae	Assorted (refer to supplementary material of paper)	Ishikawa fishing port, Ishikawa, Okinawa, Japan		Chironex	yamaguchii	GHAX01056637	PRJNA498180				--------------------------------------------------PIHAASFIVGK-WYLGHFN---------------CQFYG--FWVHFTSVSSLTNLVVIAIERYAVIKNNVIKDTKP---FAIQALLAVVSLGYGIFWASLPLLGWSSYTL-EGLSTGCAPNWVSHKMED-VTYNVTLMVSEFILPLSIIITAYVNLLKM---------------------------------------MRRH-N-	0.5689	passed	0.8619
1B	Khalturin et al. (2019)	Transcriptome (Illumina MiSeq)	TSA	Medusae	Assorted (refer to supplementary material of paper)	Ishikawa fishing port, Ishikawa, Okinawa, Japan		Chironex	yamaguchii	GHAX01065014	PRJNA498186				TSLGIPL---NVAVIFVFCRLYKKDPTT--FNLMMISNSLGDFLLIAIAGPTRITAFIKGV-AELGPLE---------------CKIYG--SWVHLTSVASLSHLVLLAVERYWVIKQGKITCIMP---FWQRLLIPLSAWFYAIFWAALPLLGWSEYAP-ESQHVGCAPKWRSVAAID-VSYNVTLMLSEFFVPVIIIGIFYKRLFKE---------------------------------------IKKR-------------------------------------------------------------------------------------------------------------------------------------Q-PSASQS------…	0.4859	passed	0.8363
1B	Khalturin et al. (2019)	Transcriptome (Illumina MiSeq)	TSA	Medusae	Assorted (refer to supplementary material of paper)	Ishikawa fishing port, Ishikawa, Okinawa, Japan		Chironex	yamaguchii	GHAX01065015	PRJNA498187				----------------------------------------------------------------------------------------G--FMPYF-------------------------------------------AWFYAIFWAALPLLGWSEYAP-ESQHVGCAPKWRSVAAID-VSYNVTLMLSEFFVPVIIIGIFYKRLFKE---------------------------------------IKKR---	0.6749	passed	0.5302
1B	Khalturin et al. (2019)	Transcriptome (Illumina MiSeq)	TSA	Medusae	Assorted (refer to supplementary material of paper)	Ishikawa fishing port, Ishikawa, Okinawa, Japan		Chironex	yamaguchii	GHAX01070900	PRJNA498189				SILSAIL---NTLVIVVFIKIYRKDHKL--LHLLIISLAGADLLPALASYPLTAYRTYQNDDNAKTTVE---------------CGFEG--ICIQIAALVSVTHLAFMACERYMVISSGTSK----ILSFKWHVIILISIWIYGIVISSMPLMGWSSYQP-EGLEMSCTVNWRSKMTED-LSYNIVLMLCDFILPLMVIVYSYTRLFLF---------------------------------------TRNN-GF--------------------------EKRW--------------------------------------------------------------------------------------------------IDS-VVNIGP------…	0.5088	passed	0.998
1B	Khalturin et al. (2019)	Transcriptome (Illumina MiSeq)	TSA	Medusae	Assorted (refer to supplementary material of paper)	Ishikawa fishing port, Ishikawa, Okinawa, Japan		Chironex	yamaguchii	GHAX01072010	PRJNA498190				TLFGIPS---NLLVIVVFRRIYRQSPTT--MNLLIISTTVSDFFLIFYAGPVHTYMYVKRN-WTMGYFG---------------CQFYG--FWVHMTSVASLTHLVVISVERYLIIKNKKKNDQRP---FRHQLIFVSLAWGYAIFWSLLPFFGWSSYVL-EGLHTGCAPKWVSRDFVD-VSYNITLMVTEFILPLIIIVVSYVKLFST---------------------------------------IKHH-N----------------------------ESL--------------------------------------------------------------------------------------------------SAT-HKSEAA------…	0.4682	passed	0.8484
1B	Khalturin et al. (2019)	Transcriptome (Illumina MiSeq)	TSA	Medusae	Assorted (refer to supplementary material of paper)	Ishikawa fishing port, Ishikawa, Okinawa, Japan		Chironex	yamaguchii	GHAX01083372	PRJNA498196				FLAGLLL---NGAMILIFKSIYHTSKTC--TSVLIISISACNLL-HVLTYPLNVIASFRRS-WEFGNTA---------------CELDA--FWVHWMAITSVAHLTMLSMERFFTVSGKPFVKRK-----VYIRLVVPGCWFYGLFWSVLPLFGWSGYGL-EGIGISCSAKFGSTRIED-VSYLVCVFITNFFLPIFIITFCYSVIYYR---------------------------------------IRKH---------------------------------------------------------------------------------------------------------------------------------------------------…	0.6784	passed	0.8371
1B	Khalturin et al. (2019)	Transcriptome (Illumina MiSeq)	TSA	Medusae	Assorted (refer to supplementary material of paper)	Ishikawa fishing port, Ishikawa, Okinawa, Japan		Chironex	yamaguchii	GHAX01083373	PRJNA498197				FLAGLLL---NGAMILIFKSIYHTSKTC--TSVLIISISACNLL-HVLTYPLNVIASFRRS-WEFGNTA---------------CELDA--FWVHWMAITSVAHLTMLSMERFFTVSGKPFVKRK-----VYIRLVVPGCWFYGLFWSVLPLFGWSGYGL-EGIGISCSAKFGSTRIED-VSYLVCVFITNFFLPIFIITFCYSVIYYR---------------------------------------IRKH-N----------------------------SRV--------------------------------------------------------------------------------------------------FDV-TNSTSI------…	0.4788	passed	0.97
1B	Khalturin et al. (2019)	Transcriptome (Illumina MiSeq)	TSA	Medusae	Assorted (refer to supplementary material of paper)	Ishikawa fishing port, Ishikawa, Okinawa, Japan		Chironex	yamaguchii	GHAX01083374	PRJNA498198				FLAGLLL---NGAMILIFKSIYHTSKTC--TSVLIISISACNLL-HVLTYPLNVIASFRRS-WEFGNTA---------------CELDA--FWVHWMAITSVAHLTMLSMERFFTVSGKPFVKRK-----VYIRLVVPGCWFYGLFWSVLPLFGWSGYGL-EGIGISCSAKFGSTRIED-VSYLVCVFITNFFLPIFIITFCYSVIYYR---------------------------------------IRKH-N----------------------------SRV--------------------------------------------------------------------------------------------------FDV-TNSTSI------…	0.4788	passed	0.97
1B	Khalturin et al. (2019)	Transcriptome (Illumina MiSeq)	TSA	Medusae	Assorted (refer to supplementary material of paper)	Ishikawa fishing port, Ishikawa, Okinawa, Japan		Chironex	yamaguchii	GHAX01083376	PRJNA498199				FLAGLLL---NGAMILIFKSIYHTSKTC--TSVLIISISACNLL-HVLTYPLNVIASFRRS-WEFGNTA---------------CELDA--FWVHWMAITSVAHLTMLSMERFFTVSGKPFVKRK-----VYIRLVVPGCWFYGLFWSVLPLFGWSGYGL-EGIGISCSAKFGSTRIED-VSYLVCVFITNFFLPIFIITFCYSVIYYR---------------------------------------IRKH-N----------------------------SRV--------------------------------------------------------------------------------------------------FDV-TNSTSI------…	0.4806	passed	0.9706
1B	Khalturin et al. (2019)	Transcriptome (Illumina MiSeq)	TSA	Medusae	Assorted (refer to supplementary material of paper)	Ishikawa fishing port, Ishikawa, Okinawa, Japan		Chironex	yamaguchii	GHAX01083377	PRJNA498200				FLAGLLL---NGAMILIFKSIYHTSKTC--TSVLIISISACNLL-HVLTYPLNVIASFRRS-WEFGNTA---------------CELDA--FWVHWMAITSVAHLTMLSMERFFTVSGKPFVKRK-----VYIRLVVPGCWFYGLFWSVLPLFGWSGYGL-EGIGISCSAKFGSTRIED-VSYLVCVFITNFFLPIFIITFCYSVIYYR---------------------------------------IRKH-N----------------------------SRV--------------------------------------------------------------------------------------------------FDV-TNSTSI------…	0.4806	passed	0.9706
1B	Khalturin et al. (2019)	Transcriptome (Illumina MiSeq)	TSA	Medusae	Assorted (refer to supplementary material of paper)	Ishikawa fishing port, Ishikawa, Okinawa, Japan		Chironex	yamaguchii	GHAX01106963	PRJNA498203				SVIGAGL---NATVAVFFYKLYKKEGRL--INILIVSTAISDLLPSLLAYPATAVRTFKKNPYTSENIV---------------CKFEG--FCIHLTALTSVIHLAAMAFERYSVIKSGTSK----IFSLQKQCVIIIAIWMYSGLISSLPFMGWSKYYP-EGFQTSCTVNWKSKAKLD-ISYNSFLMFSNFVVPLTVITYCYIGLYKY---------------------------------------VRSN-TI--------------------------SKRW--------------------------------------------------------------------------------------------------TDS-EISRQS------…	0.4558	passed	0.5874
1B	Ames, C. L. and Pirro, S. (unpublished). The complete genome sequence of Chironex yamaguchii, the Viper Jellyfish. Direct Submission to NCBI.	WGS (Illumina)	WGS	Medusae	Tentacle	Naha Port, Okinawa, Japan		Chironex	yamaguchii	JANTCA010001074	PRJNA764276		isolate IRGN CYG001		TIFGTLA---NVLVIYVFCRIYSANRIT--INVLIITTAVYDAALIAVAGPIHAASFIVGK-WYLGHFN---------------CQFYG--FWVHFTSVSSLTNLVVIAIERYAVIKNNVIKDTKP---FAIQALLAVVSLGYGIFWASLPLLGWSSYTL-EGLSTGCAPNWVSHKMED-VTYNVTLMVSEFILPLSIIITAYVNLLKM---------------------------------------MRRH-N----------------------------KVI--------------------------------------------------------------------------------------------------SRM-EANQAN------…	0.4682	passed	0.5119
1B	Ames, C. L. and Pirro, S. (unpublished). The complete genome sequence of Chironex yamaguchii, the Viper Jellyfish. Direct Submission to NCBI.	WGS (Illumina)	WGS	Medusae	Tentacle	Naha Port, Okinawa, Japan		Chironex	yamaguchii	JANTCA010002914	PRJNA764276		isolate IRGN CYG001		MIIGFPA---NVIVIFAFYRIYTNNPCT--INMLIISSSISNVLLIVVILPMQIALYSNRQ-EKFGAEA---------------CQFYG--FWAHFTAVASLCHLTSISIQRYILMKYPKKITLER---LKHQVYTVVFSWAYAAVFALLPFLGWSEYDY-EGIHTGCAPKWHSKSMQD-VSYNILLLIFEFCFPLTLITVCHIRLFRR---------------------------------------VVRH-N----------------------------RIMMR----------------------------------------------------------------------------------------------------KETLED------…	0.4682	passed	0.8205
1B	Ames, C. L. and Pirro, S. (unpublished). The complete genome sequence of Chironex yamaguchii, the Viper Jellyfish. Direct Submission to NCBI.	WGS (Illumina)	WGS	Medusae	Tentacle	Naha Port, Okinawa, Japan		Chironex	yamaguchii	JANTCA010006127	PRJNA764276		isolate IRGN CYG001		SILSAIL---NTLVIVVFIKIYRKDHKL--LHLLIISLAGADLLPALASYPLTAYRTYQNDDNAKTTVE---------------CGFEG--ICIQIAALVSVTHLAFMACERYMVISSGTSK----ILSFKWHVIILISIWIYGIVISSMPLMGWSSYQP-EGLEMSCTVNWRSKMTED-LSYNIVLMLCDFILPLMVIVYSYTRLFLF---------------------------------------TRNN-GF--------------------------EKRW--------------------------------------------------------------------------------------------------IDS-VVNIGP------…	0.5088	passed	0.998
1B	Ames, C. L. and Pirro, S. (unpublished). The complete genome sequence of Chironex yamaguchii, the Viper Jellyfish. Direct Submission to NCBI.	WGS (Illumina)	WGS	Medusae	Tentacle	Naha Port, Okinawa, Japan		Chironex	yamaguchii	JANTCA010015456	PRJNA764276		isolate IRGN CYG001		AIITLLL---NAIIIVVFKKIYSHTPSL--VNLLIITSSITNILQASTAYPMAGVSNFYTE-WIYGPKG---------------CQFYG--FWVHSMALSNICQLSLVSYCQWRTVKSNAVQQVHL--PFYSQLSIVSTTWLYGILWSIPPFFGWSEYAQ-EGIGTSCSVAWTANNIID-RSYTICIIITHFLLPLWVIIYSYARIWNR---------------------------------------VRLH------------------------------------------RKSLLQRQRSRVVANS-----NITHQLDENDNYRYSSRDETTV-------------ENY---PQISRANEVSRRKDPTVFHVSL-PLDSSER-ASNPSY-QMDAI…	0.341	passed	0.0547
1B	Ames, C. L. and Pirro, S. (unpublished). The complete genome sequence of Chironex yamaguchii, the Viper Jellyfish. Direct Submission to NCBI.	WGS (Illumina)	WGS	Medusae	Tentacle	Naha Port, Okinawa, Japan		Chironex	yamaguchii	JANTCA010022366	PRJNA764276		isolate IRGN CYG001		TSLGIPL---NVAVIFVFCRLYKKDPTT--FNLMMISNSLGDFLLIAIAGPTRITAFIKGV-AELGPLE---------------CKIYG--SWVHLTSVASLSHLVLLAVERYWVIKQGKITCIMP---FWQRLLIPLSAWFYAIFWAALPLLGWSEYAP-ESQHVGCAPKWRSVAAID-VSYNVTLMLSEFFVPVIIIGIFYKRLFKE---------------------------------------IKKR-------------------------------------------------------------------------------------------------------------------------------------Q-PSASQS------…	0.4859	passed	0.8363
1B	Ames, C. L. and Pirro, S. (unpublished). The complete genome sequence of Chironex yamaguchii, the Viper Jellyfish. Direct Submission to NCBI.	WGS (Illumina)	WGS	Medusae	Tentacle	Naha Port, Okinawa, Japan		Chironex	yamaguchii	JANTCA010022744	PRJNA764276		isolate IRGN CYG001		IVATVPL---NLIVIIAFKNIYKRRPGL--INLLIISTSINNILQALVAYPMAAISNFYSE-WIFGHSG---------------CQFYG--FWVHTMSLSTVAQLSVLSYRQWTIVKAKNVKSVYL--PVRSQLLILLSTWLYSSFWSALPYIGWSTYVY-EGIKTSCAVAWQSRDIND-LSYSGCLLVSNFIVPLGTMIFSYVKMWNR---------------------------------------IRIH-NRRQEDSERIASQDTGIRNRCSTCLCTKSKKIESFSR---KKDCSQQKQKSPMKINAECKSTKIATKMFTAENKVTISSTKLE------------SKENYALGPCSSSCLETSQKID----SLNLNPTLNHDNANTNKKF------…	0.2827	failed	0.0008
1B	Ames, C. L. and Pirro, S. (unpublished). The complete genome sequence of Chironex yamaguchii, the Viper Jellyfish. Direct Submission to NCBI.	WGS (Illumina)	WGS	Medusae	Tentacle	Naha Port, Okinawa, Japan		Chironex	yamaguchii	JANTCA010024697	PRJNA764276		isolate IRGN CYG001		SVIGAGL---NATVAVFFYKLYKKEGRL--INILIVSTAISDLLPSLLAYPATAVRTFKKNPYTSENIV---------------CKFEG--FCIHLTALTSVIHLAAMAFERYSVIKSGTSK----IFSLQKQCVIIIAIWMYSGLISSLPFMGWSKYYP-EGFQTSCTVNWKSKAKLD-ISYNSFLMFSNFVVPLTVITYCYIGLYKY---------------------------------------VRSN-TI--------------------------SKRW--------------------------------------------------------------------------------------------------TDS-EISRQS------…	0.4558	passed	0.5874
1B	Ames, C. L. and Pirro, S. (unpublished). The complete genome sequence of Chironex yamaguchii, the Viper Jellyfish. Direct Submission to NCBI.	WGS (Illumina)	WGS	Medusae	Tentacle	Naha Port, Okinawa, Japan		Chironex	yamaguchii	JANTCA010058844	PRJNA764276		isolate IRGN CYG001		FITGLVL---NGSVILIFRTIYKETKGC--TDLLILSISYCNLF-HILTYPLNIISSFQRH-WGFGNTV---------------CQLDA--FWVHSMANTSIAHLTMLSVDRYVSVSGRQVNKLT-----WYKYSVVAGCWVYGFLWSTLPLVGWSEYEL-EGIGISCSAKFGSVKIED-ISYDIILFIFDFLLPLSIIALCHVGIYAR---------------------------------------IRKH-N----------------------------IIV--------------------------------------------------------------------------------------------------FNT-GDELTD------…	0.4788	passed	0.9701
1B	Ames, C. L. and Pirro, S. (unpublished). The complete genome sequence of Chironex yamaguchii, the Viper Jellyfish. Direct Submission to NCBI.	WGS (Illumina)	WGS	Medusae	Tentacle	Naha Port, Okinawa, Japan		Chironex	yamaguchii	JANTCA010058844	PRJNA764276		isolate IRGN CYG001		FLAGLLL---NGAMILIFKSIYHTSKTC--TSVLIISISVCNLL-HVLTYPLNVIASFRRS-WEFGNTA---------------CELDA--FWVHWMAITSVAHLTMLSMERFFTVSGKPFVKRK-----VYIRLVVPGCWFYGLFWSVLPLFGWSGYGL-EGIGISCSAKFGSTRIED-VSYLVCVFITNFFLPIFIITFCYSVIYYR---------------------------------------MRKH-N----------------------------SRV--------------------------------------------------------------------------------------------------FDV-TNSTSI------…	0.4788	passed	0.9527
1B	Ames, C. L. and Pirro, S. (unpublished). The complete genome sequence of Chironex yamaguchii, the Viper Jellyfish. Direct Submission to NCBI.	WGS (Illumina)	WGS	Medusae	Tentacle	Naha Port, Okinawa, Japan		Chironex	yamaguchii	JANTCA010058844	PRJNA764276		isolate IRGN CYG001		FFGGLIM---NSFVLTIFRRIYRKNKNA--TNLLIISISYCNIF-HVATYPLNIIASFQTQ-WTLGLSA---------------CQAEA--FWVHFMAVTSVAHLMALAIDRYLSMAGKSFTRSS-----IYKVAIVLFCWIYGLVWTIMPLFGWSAYVS-EGLRISCSVRFGTRNEND-LSYLILLFIFDYLFPIIVIIIFYTRIYVR---------------------------------------VKKH-N----------------------------ATV--------------------------------------------------------------------------------------------------FAA-QGSIAN------…	0.4841	passed	0.9077
1B	Ames, C. L. and Pirro, S. (unpublished). The complete genome sequence of Chironex yamaguchii, the Viper Jellyfish. Direct Submission to NCBI.	WGS (Illumina)	WGS	Medusae	Tentacle	Naha Port, Okinawa, Japan		Chironex	yamaguchii	JANTCA010062455	PRJNA764276		isolate IRGN CYG001		TCFGIPA---NILVIYIFCKIYKSGPTT--INMIIISTTVTDLMLISFAGPIHTLAYAKGK-WILGHFG---------------CQFYG--FWVHFTSVASLSHLTVISVERYLVVKNNIKNDGRS---FWHQAALVSTAWLYAIFWAILPFFGWSSYAL-EGVHTGCAPKWVSRELID-VSYNIVLIFTEFIIPLIIIIYAYLKLYDK---------------------------------------VKRH-N----------------------------STM--------------------------------------------------------------------------------------------------LTK-CSSQQA------…	0.4753	passed	0.6095
1B	Ames, C. L. and Pirro, S. (unpublished). The complete genome sequence of Chironex yamaguchii, the Viper Jellyfish. Direct Submission to NCBI.	WGS (Illumina)	WGS	Medusae	Tentacle	Naha Port, Okinawa, Japan		Chironex	yamaguchii	JANTCA010084513	PRJNA764276		isolate IRGN CYG001		TLFGIPS---NLLVIVVFRRIYRQSPTT--MNLLIISTTVSDFFLIFYAGPVHTYMYVKRN-WTMGYFG---------------CQFYG--FWVHMTSVASLTHLVVISVERYLIIKNKKKNDQRP---FRHQLIFVSLAWGYAIFWSLLPFFGWSSYVL-EGLHTGCAPKWVSRDFVD-VSYNITLMVTEFILPLIIIVVSYVKLFST---------------------------------------IKHH-N----------------------------ESL--------------------------------------------------------------------------------------------------SAT-HKSEAA------…	0.4682	passed	0.8484
1B	Ames, C. L. and Pirro, S. (unpublished). The complete genome sequence of Chironex yamaguchii, the Viper Jellyfish. Direct Submission to NCBI.	WGS (Illumina)	WGS	Medusae	Tentacle	Naha Port, Okinawa, Japan		Chironex	yamaguchii	JANTCA010091130	PRJNA764276		isolate IRGN CYG001		TVFGACA---NWIVIYVFRKIYKSHPTC--FHGLLISTAISDFLMIIVAGPINVASNAKGY-FVLGDKC---------------CKFYG--FWVHFMSVTSIAHLVALSFERQSIISNTKAKLSSP---FRKILLLSGCSWIYSFIWAILPIFGWSHYTV-EGIGTSCSVAWISHKPVD-MSFNIVIIFSEFVIPLGAIIACYWKLYTT---------------------------------------VKKH-----------------------------------------------------------------------------------------------------------------------------------HRE-VRASKE------…	0.4823	passed	0.6289
1B	Khalturin et al. (2019)	Transcriptome (Illumina MiSeq)	TSA	Medusae	Complete animals	Maeda fishing port, Onna, Okinawa, Japan		Copula	sivickisi	GHBG01065023	PRJNA498768				--------------------------------------------------------------------A---------------CLVDA--FLVHWMAITFTAHLVALSLDRYAFVFGLWLSKLW-----AFKYFSIAACWLYGLVWSSMPLIGWSRYTL-EGLNLSCSVDFASQEKSF-VSYSITLMVTNFLLPLILISFFYTKIYYG---------------------------------------IKRH-N-	0.5813	passed	0.9458
1B	Khalturin et al. (2019)	Transcriptome (Illumina MiSeq)	TSA	Medusae	Complete animals	Maeda fishing port, Onna, Okinawa, Japan		Copula	sivickisi	GHBG01095067	PRJNA498771				SFTGGLL---NAFVVLFFFRLYKRERRL--INILIFSTALADIFPCIIAYPLAAMRSLKRSPYQTSETP---------------CKLEG--FLIHVTALSSVIHLAVMAYERFSVIKSGTSK----VFSKRKQLLIIFAIWCYSGLISSLPFMGWSSYQP-EGLNISCTVNWKSTDSED-VGYSVFLMFTNYILPLSVIAISYVSLYRY---------------------------------------VRDN-SF--------------------------SKRW--------------------------------------------------------------------------------------------------HDS-QVNRDY------…	0.4523	passed	0.9219
1B	Khalturin et al. (2019)	Transcriptome (Illumina MiSeq)	TSA	Medusae	Complete animals	Maeda fishing port, Onna, Okinawa, Japan		Copula	sivickisi	GHBG01187695	PRJNA498777				TTFGMAT---NTVVIIIFFMLYKSSPTT--FNAVVISTAVSDFLLMAVGGPVNILSTIKRS-FAFGPRM---------------CTFLG--FWVHLMSVSSIAHLTALAYDRYIVLSQLNSRIILS---KKKTLLYIFFCWMYSLLWAAPPLFGWSRYVP-EGIEISCSIQWVSHEPLD-ISFNIVIMFSEFFIPLVLILVCYRKVF------------------------------------------------------------------------------------------------------------------------------------------------------------------------------------------------…	0.6837	passed	0.9872
1B	Khalturin et al. (2019)	WGS (Illumina MiSeq)	WGS	Adult male	Gonads	Ondo Fishing Port, Hiroshima Prefecture, Japan		Morbakka	virulenta	RDPX01000008	PRJNA494059		isolate OFP		SITGTIL---NLLVIIIFVKLYRRDYKF--LNLMIASTAISDLLPSITAYPLTAYRNYSKRAYKDSSIE---------------CEFEG--ICIQLAALVSVSHLALMAYERYVVITTGFSP----ILSATWHLIIIGSVWIYGILVSCMPLFGWSRYVP-EGIETSCTVNWRSRNVLD-ISYNSLLMFVDFLLPLCIILYSYFRLWYF---------------------------------------TKHN-GF--------------------------KRQW--------------------------------------------------------------------------------------------------VDS-VVNERR------…	0.4558	passed	0.5624
1B	Khalturin et al. (2019)	WGS (Illumina MiSeq)	WGS	Adult male	Gonads	Ondo Fishing Port, Hiroshima Prefecture, Japan		Morbakka	virulenta	RDPX01000040	PRJNA494059		isolate OFP		TLLTLIF---NFPIILIIKIVFKTQPSL--INLLIACIAFSNTVQGCVAYPMVIASNFKKE-WIFGEHG---------------CQFYG--SLVHMMSLFTISCLSAIAYRQWMIMKSNTSNSQFL--SLAKQMFVICCLFSYAVLWSTLPHFGLSAYVL-EGIKTSCSVNWESPNRNG-KIYIALLFVFDYVAPLSIIFI----------------------------------------------PTSEY-GIN-----------------------------------------------------------------------------------------------------------------------------------------------…	0.6095	passed	0.6275
1B	Khalturin et al. (2019)	WGS (Illumina MiSeq)	WGS	Adult male	Gonads	Ondo Fishing Port, Hiroshima Prefecture, Japan		Morbakka	virulenta	RDPX01000043	PRJNA494059		isolate OFP		SILGGLL---NSFVILFFFRLYKRERLL--INLLIFSTAISDLLPSLYAYPIAAVRTLKQDAFKKNNLA---------------CTVEG--VCVHMSALSSVVHLATMAYERFSVIKCGTSK----IFSVRKQYVIVICIWTYSFLVCILPLLGWSSYEP-EGLNTSCTANWKSKKAID-VSYNLFIMFTNFLFPLIVIAVSYIGLYRY---------------------------------------VKKN-SF--------------------------NTHW--------------------------------------------------------------------------------------------------SDS-QIRRDF------…	0.4594	passed	0.8801
1B	Khalturin et al. (2019)	WGS (Illumina MiSeq)	WGS	Adult male	Gonads	Ondo Fishing Port, Hiroshima Prefecture, Japan		Morbakka	virulenta	RDPX01000112	PRJNA494059		isolate OFP		FFFGLIL---NTFIVIIFRRIYDESKTA--SNLLILSTTYCNLF-HILTYPLNIISCFKSK-WVFGAIV---------------CRLDA--FWVHFMAITSVSHVTMLAVDRYLSVKRKTITLSR-----NYKIMSVSICWVYGFMWSVMPLLGWSDYGI-EGIGISCSAKFGSASKED-MSYHITLFFTDFILPVLTIFICYLAIYQH---------------------------------------IRRH-N----------------------------QII--------------------------------------------------------------------------------------------------YNG-DAAIPG------…	0.4947	passed	0.8117
1B	Liegertová et al. (2015)	Transcriptome (454 pyrosequencing)	Protein	Assorted (refer to paper)	Assorted (refer to paper)	La Parguerra, Puerto Rico	Tcop17	Tripedalia	cystophora	AGB67488		A0A059NTD1		c-like opsin, partial	AILTIPP---NLLVMMVFKNIYMTRPGL--INLLIIAVSFNSTMQALVAYPLAIASNFAKK-WIFGYYG---------------CQFYG--FCVHVMALSTISQLAVIAYRQWKIIQSNEIQQKYL--TLRSQVLILILTWIYGVLWSIPPYFGWSKYVY-EGIDTSCSVAWESDATID-QSYTVSLLISNFTLPFLVLIYSYFSIYRM---------------------------------------MRRHVNIRM--------------------ISTKMKHLSSGCKWGEEKAGGSEKMKSESTVHSIKSDTSQTPRVRSMEKQYGDGKQNLQVVQFCKDMSGSVSEHQRTNNDCTSESYEV---------AISL-PRTLSDT-KQSASHIIIERE…	0.318	passed	0.1416
1B	Liegertová et al. (2015)	Transcriptome (454 pyrosequencing)	Protein	Assorted (refer to paper)	Assorted (refer to paper)	La Parguerra, Puerto Rico	Tcop16	Tripedalia	cystophora	AGB67489		A0A059NTC5		c-like opsin	SALGGIL---NAFVLVFFFRLYKRERRL--INILMFSTAVSDLAPSLLAYPVAGVRTIQRAPYKSHSIS---------------CKLEG--FCVHLTALSSVIHLAVMAYERFSVIKSGTSK----VFSVRKQQGIIFAIWMYALAVSLLPFMGWSSYEP-EGLNTSCTVHWKSSNKED-VSYNIFLMFTNFIFPLFVIAISYIRLYKY---------------------------------------VRNN-SF--------------------------SKRW--------------------------------------------------------------------------------------------------HDS-RVNRDY------…	0.5035	passed	0.8478
1B	Liegertová et al. (2015)	Transcriptome (454 pyrosequencing)	Protein	Assorted (refer to paper)	Assorted (refer to paper)	La Parguerra, Puerto Rico	Tcop15	Tripedalia	cystophora	AGB67490		A0A059NTD5		c-like opsin	FILGIFL---NGVVIVIFHFLHEETKRC--ADLLILSVSYCNLL-HVSTYPLNIVSSFQHH-WGYGTAL---------------CQMDG--FWIHSLSIVSVAHLTALSFERYLTVTGRMTDRGR-----KLKLSLVLVCWLYGFFWGAMPLFGWSDYRL-EGLLITCSITFSSSDPGD-ISFAIVAFLVDFLLPLALIIGFYIAILFT---------------------------------------VRRC-N----------------------------RSTEV-----------------------------------------------------------------------------------------------ENASPSMTVIN------…	0.4912	passed	0.7667
1B	Liegertová et al. (2015)	Transcriptome (454 pyrosequencing)	Protein	Assorted (refer to paper)	Assorted (refer to paper)	La Parguerra, Puerto Rico	Tcop12	Tripedalia	cystophora	AGB67493		A0A059NTD2		c-like opsin	FVVGLLM---NAILIVIFRNIYNKASSC--TNLLILSLSVCNLL-HVTIYPLNFIAAFSKG-WHFGETG---------------CVLDG--FWVHWMAITAICHLTLLAVDRFLVMHGKQVIALR-----SYKYGSTIGCWLYGLFWSIMPLLGWSKYAL-EGIQIGCSANFDSHKSED-FSYHVILFLTNFILPLALIAGCYIAVFYK---------------------------------------LREH-N----------------------------NKV--------------------------------------------------------------------------------------------------GDILTTTVVK------…	0.4965	passed	0.8096
1B	Liegertová et al. (2015)	Transcriptome (454 pyrosequencing)	Protein	Assorted (refer to paper)	Assorted (refer to paper)	La Parguerra, Puerto Rico	Tcop10	Tripedalia	cystophora	AGB67495		A0A059NTD6		c-like opsin	TIIGLPA---NFVVVFIFRYVYASNPSS--LNMVIISSSICNLLLILVAGPVHTDVYIHGR-WRFGYDG---------------CQFYG--FWVHFTAVSELSHLTIISMHRYYLIASKQRARSQR---VGQQLALVSAAWIYSALFAVLPFLGLSKYDF-EGLHTGCAPRWGSAEIKD-ATYNVLLLCFEFVLPFSVILYCNIKLMKT---------------------------------------INMH-N----------------------------RRM--------------------------------------------------------------------------------------------------IDR-STIEE-------…	0.4929	passed	0.9222
1B	Liegertová et al. (2015)	Transcriptome (454 pyrosequencing)	Protein	Assorted (refer to paper)	Assorted (refer to paper)	La Parguerra, Puerto Rico	Tcop8	Tripedalia	cystophora	AGB67497		A0A059NTG8		c-like opsin, partial	FIFGLVL---YGFVILVFHSILRESKTC--TNLLILSLSYCNLF-HVFSYPLNIVSCFQRG-WGYGRLG---------------CEIDA--FWVHWMAITSVAHLMMLAIDRYLSVKGRLSIKGP-----VYINLTVAFCWLYGLLWSSLPLTGWSSYEL-EGMKISCSAKFGSNAALD-ISYYIALFITDYTLPLVIIVLCYVGIYMH---------------------------------------IRRH-N----------------------------ALV--------------------------------------------------------------------------------------------------FNG-TTAVPG------…	0.53	passed	0.9216
1B	Liegertová et al. (2015)	Transcriptome (454 pyrosequencing)	Protein	Assorted (refer to paper)	Assorted (refer to paper)	La Parguerra, Puerto Rico	Tcop4	Tripedalia	cystophora	AGB67501		A0A059NTG3		c-like opsin	TTFGAIS---NGVVIYAFLKIFKGCPST--FNGLIISVTVSDILMIVISGTINIASGFNRG-FVFGEAG---------------CSFLA--FWVHFFSVSSVAHLTALSIERYRIISERSVHHNFS---RTRTAVVILICYLYSFAWVIPPIVGWSSYTT-EGMEISCSVNWKAGDWNS-MSYNITILFTVFIIPFGIILICYRKLFRL---------------------------------------LKNA-----------------------------------------------------------------------------------------------------------------------------------RDV-DVGSPD------…	0.4982	passed	0.7235
1B	Liegertová et al. (2015)	Transcriptome (454 pyrosequencing)	Protein	Assorted (refer to paper)	Assorted (refer to paper)	La Parguerra, Puerto Rico	Tcop3	Tripedalia	cystophora	AGB67502		A0A059NTG9		c-like opsin	TAVGVHA---NAVVVFIFYRLYKRSSNT--FNVIMISTSLGDLMLIAVAGPTRVLSYLKGV-AKLGNLE---------------CKIYG--CWVHLTSVASLGHLVLLAAERYWVIKYEKKQDDRP---IWKKILLVFLPWLYATLWTILPLLGWSEYAP-ESQHVGCAPKWISTDPLD-VSYNATIMISEFFLPLAIIITIYIKIFGL---------------------------------------IKDH-------------------------------------------------------------------------------------------------------------------------------------M-ERTGSE------…	0.5018	passed	0.9404
1B	Liegertová et al. (2015)	Transcriptome (454 pyrosequencing)	Protein	Assorted (refer to paper)	Assorted (refer to paper)	La Parguerra, Puerto Rico	Tcop2	Tripedalia	cystophora	AGB67503		A0A059NTD4		c-like opsin	TIIGVPS---NLLVIYIFSKIYRNSPTT--INLMIVSITTTDFMLYTFGGPVHTVSYILGK-WYLRTLR---------------MPVLR--IWVHFCSVASLSHLVVISIERYLVVKYNVKKDQRA---FWKQLLLVSTAWLYAIFWAILPFFGWSSYEL-EGVHTGCAPKWVSREIID-TTYNITLIFTEFIFPLMVIVWAYWKLIRK---------------------------------------IKEH-N----------------------------AHI--------------------------------------------------------------------------------------------------SVT-NSSEQA------…	0.4912	passed	0.707
1B	Nielsen et al. (2019)	Transcriptome (PacBio; Illumina X Ten)	TSA	Adult medusae	Complete animals	Cultured	Tcop19-SEO	Tripedalia	cystophora	GGWE01015081					----------------------------------------SDFMLITLAGPVHTYMYFKRQ-WTLGYYG---------------CQFYG--FWVHTVSVASLTHLTVMSVERYLIIKSRKKAESRP---FRYQLLFIIFAWGYAIFWAVLPFFGWSAYVK-EGLHTGCAPEWVSRKAID-VSYNIVLIVTEFLLPLAIILWAYCKLLDK---------------------------------------IKEH-T-	0.5371	passed	0.6623
1B	Khalturin et al. (2019)	Transcriptome (Illumina MiSeq)	TSA	Assorted (refer to supplementary material of paper)	Assorted (refer to supplementary material of paper)	Costa Rica	Tcop19-SEO	Tripedalia	cystophora	GHAQ01006447	PRJNA498176				TIIGVPS---NFFVILVFQRIYRNTPTT--INLIIISTTISDFMLITLAGPVHTYMYFKRQ-WTLGYYG---------------CQFYG--FWVHTVSVASLTHLTVMSVERYLIIKSRKKAESRP---FRYQLLFIIFAWGYAIFWAVLPFFGWSAYVK-EGLHTGCAPEWVSRKAID-VSYNIVLIVTEFLLPLAIILWAYCKLLDK---------------------------------------IKEH-T----------------------------RSM--------------------------------------------------------------------------------------------------AQS-QNSEVA------…	0.4753	passed	0.9388
1B	Khalturin et al. (2019)	Transcriptome (Illumina MiSeq)	TSA	Assorted (refer to supplementary material of paper)	Assorted (refer to supplementary material of paper)	Costa Rica		Tripedalia	cystophora	GHAQ01006555	PRJNA498176				SVVGGIL---NLLVIVVFTRLYRKDYKF--LNLMIVSTAIADLLPSLSAYPMTAYRTYKRQLYRHDSNE---------------CNFEG--FFIQLTALVSVSHLALMAYERYMVITSGISR----VLSPQWHIAISGSVWLYALLVSCLPLLGWSSYQP-EGLETSCTVNWSSRRVLD-ISFNALLMLADFIIPLVVIAYSYARLWYF---------------------------------------TKHN-GF--------------------------KRQW--------------------------------------------------------------------------------------------------VDS-AVNAHR------…	0.4558	passed	0.4185
1B	Khalturin et al. (2019)	Transcriptome (Illumina MiSeq)	TSA	Assorted (refer to supplementary material of paper)	Assorted (refer to supplementary material of paper)	Costa Rica	Tcop2	Tripedalia	cystophora	GHAQ01023182	PRJNA498176				-----------------------NSPTT--INLMIVSITTTDFMLITFGGPVHTVSYILGK-WYLGHFG---------------CQFYG--FWVHFCSVASLSHLVVISIERYLVVKYNVKKDQRA---FWKQLLLVSTAWLYAIFWAILPFFGWSSYEL-EGVHTGCAPKWVSREIID-TTYNITLIFTEFIFPLMVIVWAYWKLIRK---------------------------------------IKEH-N-	0.5106	passed	0.7656
1B	Khalturin et al. (2019)	Transcriptome (Illumina MiSeq)	TSA	Assorted (refer to supplementary material of paper)	Assorted (refer to supplementary material of paper)	Costa Rica	Tcop16	Tripedalia	cystophora	GHAQ01033588	PRJNA498176				SALGGIL---NAFVLVFFFRLYKRERRL--INILIFSTAVSDLAPSLLAYPVAGVRTIQRAPYKSHSIS---------------CKLEG--FCVHLTALSSVIHLAVMAYERFSVIKSGTSK----VFSVRKQQGIIFAIWMYALAVSLLPFMGWSSYEP-EGLNTSCTVHWKSSNKE-----------------------------------------------------------------------------------------------------------------------------------------------------------------------------------------------------------------------------…	0.7332	passed	0.975
1B	Khalturin et al. (2019)	Transcriptome (Illumina MiSeq)	TSA	Assorted (refer to supplementary material of paper)	Assorted (refer to supplementary material of paper)	Costa Rica		Tripedalia	cystophora	GHAQ01048256	PRJNA498176				TLFGSLA---NGLVIAVFVGLYKSNPTT--FNSFIISTAVSDFLLITVSGPINILSATKKR-FALGHAG---------------CQFLG--FWVHFMSVTSIAHLTALAYDRYVLLSTLNSRITIS---HKKPASYIICCWAYSLVWAVLPLFGWSRYVK-EGIGISCSIDWESRLPAD-IAFSVVIMFTEFFVPMALILICYRHVFVS---------------------------------------VKLL-----------------------------------------------------------------------------------------------------------------------------------NRD-SSDGQG------…	0.4929	passed	0.9688
1B	Nielsen et al. (2019)	Transcriptome (PacBio; Illumina X Ten)	Protein	Adult medusae	Complete animals	Cultured	Tcop19-SEO	Tripedalia	cystophora	QBL02615				opsin-like GPCR	----------------------------------------SDFMLITLAGPVHTYMYFKRQ-WTLGYYG---------------CQFYG--FWVHTVSVASLTHLTVMSVERYLIIKSRKKAESRP---FRYQLLFIIFAWGYAIFWAVLPFFGWSAYVK-EGLHTGCAPEWVSRKAID-VSYNIVLIVTEFLLPLAIILWAYCKLLDK---------------------------------------IKEH-T-	0.553	passed	0.7126
Outgroup	Ramirez et al. (2016)							Argopecten	irradians	KX550904			isolate Air-opnGx1	xenopsin	WMFGSFF---NGSALLIFTK-NKHLRTP--TNMFVIGLAINDFCMSSVAL-FAASASYNQG-WYHGDTV---------------CAMEG--FLVYVLGLTDLYLLCAISFDRYIVIAKPLSASKIN---HGVALLAIVGCWLGGTFWSVVPFFGWNYYHL-ELSNVSCGVSFEGNDPSI-QSYLLSIFIFCFLLPLGLIIFSYNGVYQT---------------------------------------VRNV-A----------------------------RSGVW----------------------------------------------------------------------------------------------------DMTSRV------…	0.5106	passed	0.9566
Outgroup	Ramirez et al. (2016)							Argopecten	irradians	KX550905			isolate Air-opnGx2	xenopsin	FLGGVIF---NGLFVYVFLV-HSKLKTR--PNILLISLCISSFLIAALAIPFVGASAISRK-WLFGQFG---------------CVFHG--FIVTALGLTQIAILTVLSFEKYIAIVKCHWSHRLT---QSATLLLLFGCFMYGFLLAAYPLLGWNRYTM-EDGNISCSIDWTSRSAID-LSYSISLLVIGLVVPLAVMSYVYISILLL---------------------------------------IKKQ-T----------------------------SISQR----------------------------------------------------------------------------------------------------YKGFQH------…	0.5088	passed	0.6182
Outgroup	Ramirez et al. (2016)							Argopecten	irradians	KX550906			isolate Air-opnGx3	xenopsin	AMFGFFF---NSLFIYILTT-HTNLKKK--NNLYVITLCISSILIAVLVVPTLGISSLEDR-WVFGNIG---------------CSLHG--FTMTAFGLFQIFIVTAMSMEKYVIVVRNNWNSFVS---ITGTRCSIAACLLLGVAIGSCPILGWNSYKL-EEQKISCSIDWSDKSKMA-LSYTYSILILGFVAPFSMMVFSYVSIFME---------------------------------------IRGH-IF-------------------------NLRAMLR----------------------------------------------------------------------------------------------------NSGKCY------…	0.5053	passed	0.3325
Outgroup	Ramirez et al. (2016)							Argopecten	irradians	KX550907			isolate Air-opnGx4	xenopsin	STFGVAL---NGIFIYVFWK-QTALKTP--TNYFILSLSILDFLMSLFGLPMIAISSFARD-WIFGDKG---------------CVYYG--FIMTLLGISTISILAAISFDRYIVIVKTHLKPMIS---QRVATCIIVGCLLYGLAWAIAPLLGWSKYVL-EGINISCSVNWNSDNFGD-ASFCVALLILVLVIPIIVILFCYGNIFYK---------------------------------------VKTS------------------------------------------------------------------------------------------------------------------------------------GN-NQALSD------…	0.5159	passed	0.4988
Outgroup	Kim, H. J., Sawada, C., Rhee, J. S. et al. (2014). Nutritional effects on the visual system of the rotifer Brachionus plicatilis sensu stricto (Rotifera: Monogononta). Journal of Experimental Marine Biology and Ecology 460, 177-183.							Brachionus	koreanus	AIT99323		A0A0A7DNH5		melanopsin 1, partial	------------------------------------------------------------R-WPFGKVG---------------CHFSG--VVMYIVGTIQIYLMAAISFERFFIIYKPLSI-KSI--STNVILVVVAGCTFMGVLWALFPYFGWSYYSL-EGALTSCSVEWFERSFNV-ISYNVTMFFVVYIIPLIIIFFTNIKLVLI---------------------------------------IRNLPNM	0.606	passed	0.9451
Outgroup	Kim, H. J., Sawada, C., Rhee, J. S. et al. (2014). Nutritional effects on the visual system of the rotifer Brachionus plicatilis sensu stricto (Rotifera: Monogononta). Journal of Experimental Marine Biology and Ecology 460, 177-183.							Brachionus	koreanus	AIT99326		A0A0A7DN75		c-opsin, partial	FVCSFSF---NSILLWVFYK-SKELRSP--LNIIMIALTILNLIGTITELP-----TYFTR-WIFGKLI---------------CTVTG--FVMYFIGCSSIYLLTAISFERWYVIVEPFKQRYFT---IKVTLVIITGCCLFSSIWCIAPLLGWSHYSL-ELSLVTCSVEWEEKSFNV-LSYNLVIFGFVYLIPLTILIYTNIKLIVI---------------------------------------IKSL-NRF-----------------------------------------------------------------------------------------------------------------------------------LKSSKQ------…	0.523	failed	0.0032
Outgroup	Kim, H. J., Sawada, C., Rhee, J. S. et al. (2014). Nutritional effects on the visual system of the rotifer Brachionus plicatilis sensu stricto (Rotifera: Monogononta). Journal of Experimental Marine Biology and Ecology 460, 177-183.							Brachionus	koreanus	AIT99333		A0A0A7DNH9		melanopsin 3, partial	------------------------------------------------------------R-WIFPKAF---------------CAISA--FIMYFIGCTSIYLMVAISFERLHVISQPVNKIGRK-ITKSFYILVVFICMMLGLFWSVMP-FGWSYYTF-EGVGTSCSVEWNNKALNV-ISYNLAILVFVFLLPSICLLVNNLKLISL---------------------------------------VSRMLKL	0.5972	passed	0.2871
Outgroup	Zhang, G., Fang, X., Guo, X. et al. (2012). The oyster genome reveals stress adaptation and complexity of shell formation. Nature 490, 49-54.							Crassostrea	gigas	EKC19391	PRJNA70283	K1QCZ3		melanopsin	FTFGSFM---NFTGLLVFAK-NKHMRSP--TNTFIISLLMGDFGMSICSF-ISMTAHYNRF-YLWGDNV---------------CTFEG--FWMYFMGLTNMYTIMGISFDRYIVIAKPLQASKIT---TRVAVAACLAIWFQGFAWAAFPFLGWGRYTY-EAGRTSCSVQWDTDDIES-ASYNISIFIWSLFLPLMLIFYCYYNVFMT---------------------------------------IRHV-A----------------------------RNGVW----------------------------------------------------------------------------------------------------DMNSRI------…	0.5106	passed	0.1799
Outgroup	Zhang, G., Fang, X., Guo, X. et al. (2012). The oyster genome reveals stress adaptation and complexity of shell formation. Nature 490, 49-54.							Crassostrea	gigas	EKC19392	PRJNA70283	K1P6Y0		melanopsin	VTLGPFM---NITSLAVFAQ-NKHLRSP--TNIFVISLLLGDVGMSCVAL-ISMVAHFNRY-YFWGDRV---------------CVFEG--FWLYLMGLTNLYTHAVIAVDRYIVIAKPLSAHRVT---KRVAVVAVLVVWIQGLLWASFPHFGWGKYTY-EPARTSCAVEWDSKEIGS-ASYNVAITIWSLCIPLGLIVFSYYRVFMTVTESMAGIKRIFGFRMLKYLEFLNINGNVLYNLSGNGAEIRHV-A----------------------------RSGIW----------------------------------------------------------------------------------------------------DTSSRI------…	0.4611	passed	0.897
Outgroup	Zhang, G., Fang, X., Guo, X. et al. (2012). The oyster genome reveals stress adaptation and complexity of shell formation. Nature 490, 49-54.							Crassostrea	gigas	EKC20545	PRJNA70283	K1PW76		melanopsin	MLISTLG---NGGVMYVFIR-TRNLRTP--NYFLVSALCLGDFLMSTLGMPMFITSCFFTR-WILGRVG---------------CLVYG--TLMTFLGLSQITLLASIAFTRYRYVVNNCSIDTLF------AKIVVIMCYLYAFIFSLAPLFGWSRPVV-EPIGTSCGPNWAGTEPRD-VSYNLTIFVLCFFVPLSIITFSYFMIYLK---------------------------------------IKRK-RI------------------------------------------------------------------------------------------------------------------------------------------------…	0.5318	passed	0.6791
Outgroup	Zhang, G., Fang, X., Guo, X. et al. (2012). The oyster genome reveals stress adaptation and complexity of shell formation. Nature 490, 49-54.							Crassostrea	gigas	EKC20546	PRJNA70283	K1QG76		opsin-VA	NVVATTG---NVVVLYVFFR-SKKLHSA--IYFMISALCLGDLLMSSVGLTILSIASFATY-WVLGDWG---------------CIAYG--TLMTFLGLMQITLLTVIAVTRYIFVVHNNNIGPCS------AKVITLLCTLYALGFSVAPLLGWSKFVL-EPIGTSCGPNWVGIEWSD-VSFNMTLFFLCFLAPLSFILFSYIMIFWK---------------------------------------IKKK-RI------------------------------------------------------------------------------------------------------------------------------------------------…	0.5318	passed	0.8282
Outgroup	Darwin Tree of Life Project (https: //www.darwintreeoflife.org/)							Crassostrea	gigas	XP_011412507	PRJNA629593			parapinopsin	VTLGPFM---NITSLAVFAQ-NKHLRSP--TNIFVISLLLGDVGMSCVAL-ISMVAHFNRY-YFWGDRV---------------CVFEG--FWLYLMGLTNLYTHAVIAVDRYIVIAKPLSAHRVT---KRVAVVAVLVVWIQGLLWASFPHFGWGKYTY-EPARTSCAVEWDSKEIGS-ASYNVAITIWSLCIPLGLIVFSYYRVFMT---------------------------------------IRHV-A----------------------------RSGIW----------------------------------------------------------------------------------------------------DTSSRI------…	0.5106	passed	0.6129
Outgroup	Darwin Tree of Life Project (https: //www.darwintreeoflife.org/)							Crassostrea	gigas	XP_011421213	PRJNA629593			melanopsin-B-like	TFFGILV---NGAVIYLYFS-RREIATV--SNMYIVALCLCGFLIATLGIPFAAASSIRHH-WLFGDGM---------------CKLHG--FLLTGLGIVMIALMTGIAIDKYIHIVWFQAHRKVT---KSFALGIITLCYVYGVIWGILPLFGWNKYIL-EPARLTCSVEWTGDFSNH--SYAITILFTGLLIPVGVIASLYSSILKK---------------------------------------IHLQ---------------------------------------------------------------------------------------------------------------------------------------RKSSQQ------…	0.5106	passed	0.4359
Outgroup	Yoshida, M. A., Ogura, A., Ikeo, K. et al. (2015). Molecular evidence for convergence and parallelism in evolution of complex brains of cephalopod molluscs: insights from visual systems. Integrative and Comparative Biology 55, 1070-1083.							Idiosepius	paradoxus	BAR90773		A0A0H5ATB0		ciliary opsin, partial	SAASFLL---NGAVIVLFML-RKDLLTP--TNVFIVTLSVCDFLIATLGNPLAIVSSAMRR-WYFGRSV---------------CVWYG--FLMTFLGLSAISLLTAISVDRYVLIVHTMRTMTIS---LRTSVVCLICCGLYALFWAVMPLLGWNGYVT-EINGIACSVDWQGETPAA-TSYIILLLICCLIIPMFLIGFSYIRIFMT---------------------------------------VYKK---------------------------------------------------------------------------------------------------------------------------------------SHSNQM------…	0.5177	passed	0.7601
Outgroup	Luo, Y. J., Takeuchi, T., Koyanagi, R. et al. (2015). The Lingula genome provides insights into brachiopod evolution and the origin of phosphate biomineralization. Nature Communications 6, 8301.							Lingula	anatina	XP_013382905	PRJNA293030			rhodopsin, GQ-coupled	TILGIFG---NTSILLMFLK-FKNLRST--TNLFIMSLNVSDLMLAVFGCPMSGISSFALK-WVFGDVG---------------CVLHG--FMMYFAGLSEMYCLTAIAIDRYIVIAKPLLAPAIT---QTKALIAIVACYVGGLMFAMAPLFGWSKYTY-EGAGTTCGIDWITKRPQD-VSFAITILIACYLTPVGIMLFCYLNIYLT---------------------------------------VLSS-T----------------------------RSGTW----------------------------------------------------------------------------------------------------DKQSSI------…	0.5088	passed	0.1725
Outgroup	Luo, Y. J., Takeuchi, T., Koyanagi, R. et al. (2015). The Lingula genome provides insights into brachiopod evolution and the origin of phosphate biomineralization. Nature Communications 6, 8301.							Lingula	anatina	XP_013397676	PRJNA293030			melanopsin-like	SFLGMVM---NVGVILTYIL-NKELQNS--VNMFIASLSVGDALMSFLAV-LVAVNNFAEE-WLYGDAG---------------CTFYA--FSMTFLGLAAINQMSAVAADRYVVVTRP--HSVLV--EKPAAVTTIVICWLAAGIWAVMPLVGWSSYQP-EADGTHCSIHWETEDENA-RSYIISLFVLEFFLPIVIICFCYGNIFHK-------------------FKFIG---------------TKVH---------------------------------------------------------------------------------------------------------------------------------------NEKSTA------…	0.5141	passed	0.7388
Outgroup	Luo, Y. J., Takeuchi, T., Koyanagi, R. et al. (2015). The Lingula genome provides insights into brachiopod evolution and the origin of phosphate biomineralization. Nature Communications 6, 8301.							Lingula	anatina	XP_013400870	PRJNA293030			visual pigment-like receptor peropsin	-------------------------------------MCVCNLVEAALSFPLMASSSFAQR-WLFSKIG---------------CQIYA--FIIFSLGLTGIFHLVIVAVDRYLVICK---DTKVK---KGSAIKGSIACWLSGILWATLPFLGWNGYIF-ERAHLSCCINWYSKDPQD-LSYIVTIMVFCLFVPMAVMSFTYGRIYIT---------------------------------------IKNS-H-	0.5636	passed	0.9287
Outgroup	Simakov, O., Marletaz, F., Cho, S. J. et al. (2013). Insights into bilaterian evolution from three spiralian genomes. Nature 493, 526-531.							Lottia	gigantea	ESO95853	PRJNA175706	V3ZWI5		hypothetical protein, partial	CITAVLF---DGCAMLVFLK-NKNLRSP--TNLFILGLNVCDFLMATIAAPLSGISSFHHR-WLFGTIG---------------CTYEG--FAVYFLGQTSMYLLAAISFDRYYVIAKPLQASKIT---HRVATIAVLACYAGGFFWAFVPLVGWNEYTL-EGAKISCSVVWESSNPVY-TSYIFTIFITCLVIPLAVMFFSYFNVYMT---------------------------------------VRKL------------------------------------------------------------------------------------------------------------------------------------------SRI------…	0.5247	passed	0.5113
Outgroup	Sadamoto, H., Takahashi, H., Okada, T. et al. (2012). De novo sequencing and transcriptome analysis of the central nervous system of mollusc Lymnaea stagnalis by deep RNA sequencing. PLoS ONE 7, e42546.							Lymnaea	stagnalis	FX185950					AAIGTLF---NGIAIAVFIR-YRDLRSP--TNSFVIALCVCDFFMSVIGAPIPAYYSLLES-YIKSDLL---------------CSLDA--FTVYFLSCTSIYLLTAISVDRYFIIVKPIASMVIT---QRTANLSIFVCFAIGGLWATMPLVGWNGYSL-EGIGVACSVTWNSKDPLY-RSFIVMLFLASFLAPLLAMGFCYASIILT---------------------------------------VRKI-F----------------------------RGTF--------------------------------------------------------------------------------------------------------MKK------…	0.5159	passed	0.7717
Outgroup	Sadamoto, H., Takahashi, H., Okada, T. et al. (2012). De novo sequencing and transcriptome analysis of the central nervous system of mollusc Lymnaea stagnalis by deep RNA sequencing. PLoS ONE 7, e42546.							Lymnaea	stagnalis	FX190223					FVVGSFC---NGLCLFVFAR-NRRLRSP--TNVFVMALNLVDFLMCFTGIPMAMTSAWAHK-WIWGDAM---------------CDFEA--FLVYFLGLASMYVLMAIAFDRYIAISKPLLGTKIT---KPLAYMSCAAMYFLGFIWAIPPAFGWNEYAL-EGAGISCSVVWENPDPVY-MSYIWAIFVFCFIIPLGVMIYSYWGVLAT---------------------------------------LRNL-N----------------------------KNSVW----------------------------------------------------------------------------------------------------DMNSRV------…	0.5088	passed	0.1745
Outgroup	Passamaneck, Y. J., Furchheim, N., Hejnol, A. et al. (2011). Ciliary photoreceptors in the cerebral eyes of a protostome larva. EvoDevo 2, 1-18.							Terebratalia	transversa	ADZ24786		F1D8E5		ciliary opsin	AILGFFM---NGSVLIIFYR-KKELRSP--TNMFIISMAFNDLMMSILGNPFAAVSNLHHR-WIFGDAA---------------CVWYG--FIMFFLGLNGIYHLTAIAFDRYIVIAKPLLSSKIT---TRVAALAISVCWFGAFLWSVFPVFGWSSYVE-EGEHSSCSINWISQSIVD-SSYIISIFIFCFFLPILLVIFSYFHVYMT---------------------------------------VRTI-A----------------------------KSNTF----------------------------------------------------------------------------------------------------GKDSKI------…	0.5088	passed	0.1204
