# Supplementary material for: Multiple opsin expression in cubozoan ocelli indicates functional redundancy
Source: Research Square preprint supplement (doi:10.21203/rs.3.rs-8376914/v1), 2026-01-02
Supplement: Supplementary file 2 [file 6f1cd854e7567631500d944e.docx]

**Supplementary Material 1.** Opsins of *Tripedalia cystophora* investigated in expression studies so far, with opsin name used in this study, C-terminus sequence (or reference to relevant expression study), location of expression pattern and method used (IHC, immunohistochemistry; ISH, in situ hybridization), GenBank accession number for full protein sequence, protein ID (protID) where relevant, reference for sequence data, and synonyms of opsin terminology from prior research. Note that for ease of reference, we have combined synonyms of some opsins in this study, e.g. Tcop5-GEO.

| **Opsin** | **C-terminus sequence / reference** | **Expression pattern (method)** | **GenBank accession no.** | **protID** | **Reference (sequence data)** | **Synonyms** |
| --- | --- | --- | --- | --- | --- | --- |
| Tcop1 | RATRVSPGEEGQ | SE outer segments  (This study) | JQ968432 | A0A059NTC8 | Liergertová et al. (2015) |  |
| Tcop2 | QVRPNDKPKKPKVEFQEDEE | SE outer segments and manubrium edge  (This study) | JQ968431 | A0A059NTD4 | Liergertová et al. (2015) |  |
| Tcop5-GEO | Garm et al. (2022) | Outer segments (all eyes) (IHC) | MH835328 | A0A059NTD7 | Nielsen et al. (2019) | Opsin/ antibody 2; Tcy-4539; Tcop5; Tc GEO |
| Tcop6 | GRNVVVTPSELE | Manubrium edge  (This study) | JQ968427 | A0A059NTC7 | Liergertová et al. (2015) |  |
| Tcop7 | AKVLARAVEVSRVN | n.a.  (This study) | JQ968426 | A0A059NTD3 | Liergertová et al. (2015) |  |
| Tcop9-GCO | Garm et al. (2022) | Gonads and cnidoctyes (IHC) | MH835327 | A0A059NTG2 | Nielsen et al. (2019) | Opsin/ antibody 3; Tcy-4539; Tcop9; Tc GCO |
| Tcop11 | GKNKIAVSEKSENL | PE outer segments and manubrium edge  (This study) | JQ968422 | A0A059NTC6 | Liergertová et al. (2015) |  |
| Tcop13-LEO | Bielecki et al. (2014) | Outer segments (ULE and LLE) (ISH) | KJ542646 | A0A059NTG7 | Bielecki et al. (2014) | Tc-leo; Tc LEO; Tcop13 |
| Tcop18-NEO | Bielecki et al. (2014) | Neuropil (ISH) | EU310498 | A0A059NTG8 | Kozmik et al. (2008) | Tc-neo; Tc NEO; Tcop18 |
| Tcop19-SEO | Garm et al. (2022) | Outer segments (SE) (IHC) | MH835329 | A0A059NTG2 | Nielsen et al. (2019) | Opsin/ antibody 1; Tcy-37162; Tc SEO |
